1 TITLE: Regeneration of dopaminergic neurons in adult zebrafish depends on  
2 immune system activation and differs for distinct populations.

3

4 AUTHORS: Lindsey J. Caldwell<sup>1§</sup>, Nick O. Davies<sup>1§#</sup>, Leonardo Cavone<sup>1</sup>,  
5 Karolina S. Mysiak<sup>1</sup>, Svetlana A. Semenova<sup>2</sup>, Pertti Panula<sup>2</sup>, J. Douglas  
6 Armstrong<sup>3</sup>, Catherina G. Becker<sup>1\*#</sup>, Thomas Becker<sup>1\*#</sup>.

7

8 ADDRESSES: <sup>1</sup>Centre for Discovery Brain Sciences, University of Edinburgh,  
9 The Chancellor's Building, 49 Little France Crescent, Edinburgh EH16 4SB,  
10 UK; <sup>2</sup>Neuroscience Center and Department of Anatomy, University of Helsinki,  
11 00290 Helsinki, Finland; <sup>3</sup>School of Informatics, University of Edinburgh, 10  
12 Crichton Street, Edinburgh EH8 9AB, UK

13

14 § joint first authors; # co-corresponding; \* joint senior authors

15

16

17

18           ABSTRACT:

19           Adult zebrafish regenerate neurons in their brain, but the extent and  
20           variability of this capacity is unclear. Here we ask whether loss of various  
21           dopaminergic neuron populations is sufficient to trigger their functional  
22           regeneration. Genetic lineage tracing shows that specific diencephalic  
23           ependymo-radial glial progenitor cells (ERGs) give rise to new dopaminergic  
24           (Th<sup>+</sup>) neurons. Ablation elicits an immune response, increased proliferation of  
25           ERGs and increased addition of new Th<sup>+</sup> neurons in populations that  
26           constitutively add new neurons, e.g. diencephalic population 5/6. Inhibiting the  
27           immune response attenuates neurogenesis to control levels. Boosting the  
28           immune response enhances ERG proliferation, but not addition of Th<sup>+</sup>  
29           neurons. In contrast, in populations in which constitutive neurogenesis is  
30           undetectable, e.g. the posterior tuberculum and locus coeruleus, cell  
31           replacement and tissue integration are incomplete and transient. This is  
32           associated with loss of spinal Th<sup>+</sup> axons, as well as permanent deficits in  
33           shoaling and reproductive behaviour. Hence, dopaminergic neuron  
34           populations in the adult zebrafish brain show vast differences in regenerative  
35           capacity that correlate with constitutive addition of neurons and depend on  
36           immune system activation.

37

38 INTRODUCTION

39 The adult mammalian brain shows very limited neurogenesis after  
40 injury or neuronal loss, leading to permanent functional deficits <sup>1,2</sup>. By  
41 contrast, the regenerative capacity of the CNS in adult zebrafish after injury is  
42 remarkable <sup>3-5</sup>. However, relatively little is known about the capacity for  
43 regeneration and functional integration after loss of discrete cell populations in  
44 the fully differentiated adult CNS.

45 To study regeneration of distinct populations of neurons without  
46 physical damage, we ablated dopaminergic and noradrenergic neurons using  
47 6-hydroxydopamine (6OHDA), which selectively ablates these neurons across  
48 vertebrates <sup>6-9</sup>. In adult zebrafish, the dopaminergic system is highly  
49 differentiated. There are 17 distinct dopaminergic and noradrenergic brain  
50 nuclei, identified by immunohistochemistry for cytoplasmic Tyrosine  
51 hydroxylase (Th) and the related Th2, rate-limiting enzymes in dopamine and  
52 noradrenaline synthesis <sup>10,11</sup>. Projections of Th<sup>+</sup> brain nuclei are far-reaching,  
53 including long dopaminergic projections to the spinal cord from population 12  
54 in the diencephalon and noradrenergic projections from the locus coeruleus  
55 (LC) in the brainstem. These projections are the only Th<sup>+</sup> input to the spinal  
56 cord <sup>10,12-14</sup>.

57 Functionally, dopamine, especially from the diencephalo-spinal  
58 projection from population 12, has roles in maturation and initiation of motor  
59 patterns in developing zebrafish <sup>15-18</sup>. In addition, dopamine has been linked  
60 to anxiety-like behaviour in zebrafish <sup>19,20</sup>. Dopaminergic neurons are  
61 constantly generated in the adult diencephalon <sup>21</sup>, but it is unclear which  
62 populations receive new neurons and how this may change after ablation.

63 For regeneration of neurons to occur, ependymo-radial glia (ERG)  
64 progenitor cells need to be activated. ERGs have a soma that forms part of  
65 the ependyma and radial processes that span the entire thickness of the  
66 brain. After a CNS injury, these cells are either activated from quiescence or  
67 increase their activity in constitutively active adult proliferation zones to  
68 regenerate lost neurons<sup>3,5,22</sup>. Activation could occur via damage to the highly  
69 branched ERG processes or early injury signals. Remarkably, the  
70 microglial/macrophage reaction following a mechanical lesion has been  
71 shown to be both necessary and sufficient for regenerative proliferation of  
72 ERGs and neurogenesis in the adult zebrafish telencephalon<sup>23</sup>. The immune  
73 response also promotes neuronal regeneration in the spinal cord of larval  
74 zebrafish after a lesion<sup>24</sup>. Hence, it might also play a role in the regenerative  
75 response after discrete neuronal loss without injury.

76 We find that locally projecting dopaminergic neurons in the  
77 diencephalon are regenerated from specific ERGs, whereas large Th<sup>+</sup>  
78 neurons with spinal projections are only transiently replaced, associated with  
79 permanent and specific functional deficits in shoaling and mating behaviour.  
80 Inhibiting the immune response abolished ablation-induced regeneration.  
81 Hence, we demonstrate an unexpected heterogeneity in regenerative capacity  
82 of functionally important dopaminergic neurons in the adult zebrafish and  
83 essential functions of the immune response.

84

85 MATERIAL AND METHODS

86

87 Animals

88 All fish were kept and bred in our laboratory fish facility according to standard  
89 methods<sup>25</sup>, and all experiments had been approved by the British Home  
90 Office. We used wild type (*wik*) and *Tg(olig2:DsRed2)*<sup>26</sup>, abbreviated as  
91 *olig2:DsRed*; *Tg(gfap:GFP)*<sup>27</sup>, abbreviated as *gfap:GFP*; *Tg(slc6a3:EGFP)*<sup>28</sup>,  
92 abbreviated as *dat:GFP*, and *Tg(her4.1:TETA-GBD-2A-mCherry)*<sup>29</sup>,  
93 abbreviated as *her4.3:mCherry*, transgenic reporter lines. Note that zebrafish  
94 nomenclature treats *her4.1* and *her4.3* as synonymous ([https://zfin.org/ZDB-](https://zfin.org/ZDB-TGCONSTRUCT-110825-6)  
95 [TGCONSTRUCT-110825-6](https://zfin.org/ZDB-TGCONSTRUCT-110825-6)). For genetic lineage tracing, we used *Tg(-*  
96 *3her4.3:Cre-ERT2)*<sup>30</sup> crossed with *Tg(actb2:LOXP-mCherry-LOXP-EGFP)*<sup>31</sup>,  
97 as previously described<sup>32</sup>. Adult (> 4 months of age) male and female fish  
98 were used for the experiments.

99

100 Bath application of substances

101 For dexamethasone treatment, fish were immersed in 15 mg/L  
102 dexamethasone (Sigma-Aldrich, D1756) or vehicle (DMSO) in system water.  
103 For lineage tracing experiments, fish were immersed in 1 µM 4-  
104 hydroxytamoxifen (Sigma-Aldrich, H6278) in system water with tanks  
105 protected from light. Fish were transferred into fresh drug/vehicle every other  
106 day.

107

108 Intraventricular injections

109 Fish were anaesthetised in MS222 (Sigma-Aldrich, 1:5000 % w/v in  
110 PBS) and mounted in a wet sponge to inject the third ventricle from a dorsal  
111 approach using a glass capillary, mounted on a micromanipulator. Using  
112 sharp forceps, a hole was made into the skull covering the optic tectum and  
113 the needle was advanced at a 45° angle from the caudal edge of the tectum  
114 into the third ventricle. The capillary was filled with a 10 mM solution of  
115 6OHDA (6-Hydroxydopamine hydrobromide, Sigma-Aldrich, product number:  
116 H116) in H<sub>2</sub>O and 0.12% of a fluorescent dextran-conjugate (Life  
117 Technologies, product number: D34682) to ablate Th<sup>+</sup> cells, or with  
118 fluorescently labelled Zymosan A (from *Saccharomyces cerevisiae*) bioparticles  
119 at a concentration of 10 mg/mL (Life Technologies, product number: Z23373)  
120 to stimulate the microglial response. LTC<sub>4</sub> (Cayman Chemicals, product  
121 number: 20210) was injected at a concentration of 500 ng/ml in 0.45% ethanol  
122 in H<sub>2</sub>O. Sham-injected controls were generated by injecting vehicle solutions.

123 A pressure injector (IM-300 microinjector, Narishige International, Inc.  
124 USA) was used to inject 0.5 to 1.0 µL of the solution. Distribution of the  
125 solution throughout the ventricular system was verified under a fluorescence-  
126 equipped stereo-microscope. This injection technique only induced a localised  
127 microglia reaction surrounding the point where the capillary penetrated the  
128 optic tectum, but not close to any of the Th<sup>+</sup> populations of interest.

129

### 130 Intraperitoneal injections

131 Fish were anaesthetised in MS222 and injected on a cooled surface on  
132 their left side with a 30½ G needle. Per application, 25 µl of 16.3 mM EdU

133 (Invitrogen) was injected intraperitoneally. EdU was dissolved in 15% DMSO  
134 and 30% Danieau's solution in distilled water.

135 Haloperidol (Sigma-Aldrich, product number: H1512) was injected at a  
136 volume of 25  $\mu$ l and a concentration of 80  $\mu$ g/ml in PBS for each injection.  
137 This roughly equates to 4 mg/kg, twice the concentration shown to be  
138 effective in salamanders <sup>8</sup>.

139

140

#### 141 Quantitative RT-PCR

142 Brains were dissected without any tissue fixation and sectioned on a  
143 vibrating-blade microtome. RNA was isolated from a horizontal section 200  
144  $\mu$ m thick at the level used for analysis of proliferating ERGs around the  
145 ventricle (refer to Fig. 5A for section level) using the RNeasy Mini Kit (Qiagen,  
146 74106). cDNA synthesis was performed using the iScript™ cDNA Synthesis  
147 Kit (Bio-Rad, 1708891). Standard RT-PCR was performed using  
148 SsoAdvanced™ Universal SYBR® Green Supermix (Bio-Rad, 172-5271).  
149 qRT-PCR (annealing temperature 58 °C) was performed using Roche Light  
150 Cycler 96 and relative mRNA levels were determined using the Roche Light  
151 Cycler 96 SW1 software. Samples were run in duplicates and expression  
152 levels were normalized to the level of 18S ribosomal RNA. Primers were  
153 designed to span an exon-exon junction using Primer-BLAST. Primer  
154 sequences:

155 TNF- $\alpha$  FW 5'-TCACGCTCCATAAGACCCAG-3', RV 5'-

156 GATGTGCAAAGACACCTGGC-3', il-1 $\beta$  FW 5'-

157 ATGGCGAACGTCATCCAAGA-3', RV 5'-GAGACCCGCTGATCTCCTTG-3',

158 18S FW 5'- TCGCTAGTTGGCATCGTTTATG-3', RV 5'-  
159 CGGAGGTTCGAAGACGATCA-3'.

160

### 161 HPLC

162 Brains were dissected without any tissue fixation and frozen. HPLC  
163 analysis was performed as described <sup>33</sup>.

164

### 165 Immunohistochemistry

166 We used mouse monoclonal antibody 4C4 (1:50; HPC Cell Cultures,  
167 Salisbury, UK, catalogue number: 92092321) to label microglia. The antibody  
168 labels microglia in the brain, but not peripheral macrophages <sup>34</sup>. We used a  
169 chicken antibody to green fluorescent protein (GFP) (1:500; Abcam,  
170 Cambridge, MA, USA, designation: ab13970); a mouse monoclonal antibody  
171 to the proliferating cell nuclear antigen (PCNA) (1:1000; Dako, Sigma-Aldrich,  
172 St Louis, MO, USA, designation: M0879); a mouse monoclonal antibody to  
173 tyrosine hydroxylase (Th) (1:1000; Merck Millipore, Billerica, MA, US,  
174 designation: MAB318). Suppliers for the appropriate fluorescence or biotin-  
175 labelled antibodies were Stratech Scientific, Sydney, Australia and Vector  
176 Laboratories, Burlingame, CA, USA, respectively. Dilutions of secondary  
177 antibodies followed the manufacturers' recommendations.

178 Immunofluorescent labelling of 50 µm sections was carried out as  
179 previously described <sup>35</sup>. Briefly, brains from perfusion-fixed (4%  
180 paraformaldehyde) animals were dissected, sectioned on a vibrating-blade  
181 microtome, incubated with primary antibody at 4°C overnight, washed,  
182 incubated in secondary antibody for 45 min at room temperature, washed and



183 mounted in glycerol. All washes were 3 times 15 minutes in PBSTx (0.1%  
184 Triton X 100 in PBS).

185 For colorimetric detection of Th, a biotinylated secondary antibody was  
186 used, followed by the ABC reaction using the Vectastain ABC kit (Vector  
187 Laboratories, Burlingame, USA) according to the manufacturer's  
188 recommendations. The colour was developed using diaminobenzidine  
189 solution (1:120 diaminobenzidine; 2 µl/ml of 1% stock NiCl<sub>2</sub> and 2 µl/ml of 1%  
190 stock CoSO<sub>4</sub> in PBS) pre-incubation (30 min at 4°C), followed by addition of  
191 30% hydrogen peroxide. Sections were mounted, dried and counterstained in  
192 neutral red staining solution (4% acetate buffer (pH 4.8) and 1% neutral red in  
193 dH<sub>2</sub>O) for 6 min, followed by differentiation in 70% and 95% ethanol.

194

#### 195 EdU detection

196 To detect EdU, we used Click-iT® EdU Alexa Fluor® 488 or 647  
197 Imaging Kits (Molecular Probes) according to the manufacturer's  
198 recommendations. Briefly, 50 µm sections from perfusion-fixed brains were  
199 incubated in Click-iT reaction buffer for three hours in the dark at room  
200 temperature, washed 3 x 10 min in 0.3% PBSTx and once in PBS. After that,  
201 sections were mounted in 70% glycerol or underwent immunofluorescent  
202 labelling as above.

203

#### 204 TUNEL labelling

205 TUNEL labelling was carried out as described<sup>36</sup> using the *in situ* TMR  
206 cell death detection kit (Roche) according to the manufacturer's  
207 recommendations. In brief, sections were incubated with reaction mix in the

208 dark at 37°C for 60 min. This was followed by immunolabelling as described  
209 above.

210

#### 211 Quantification of cells and axons

212 All counts were carried out with the observer blinded to the  
213 experimental condition. For colorimetric immunohistochemistry of Th, cell  
214 profiles were counted for individual brain nuclei, identified by neutral red  
215 counterstain. Innervation density of labelled axons was semi-quantitatively  
216 determined by determining the average pixel brightness for a region of  
217 interest using Image J.

218 In fluorescently labelled sections, cells were stereologically counted in  
219 confocal image stacks, as described <sup>35</sup>. Double-labelling of cells was always  
220 assessed in single optical sections (<2 µm thickness). Fluorescently labelled  
221 axons in the spinal cord were quantified using automatic functions in Image J  
222 as described <sup>14</sup>.

223

#### 224 Behavioural tests

225 All behaviour tests, comparing between 6OHDA-injected and sham-  
226 injected animals, were performed when at least seven days had passed after  
227 injection. All recordings were made with a Sony ExwaveHAD B&W video  
228 camera and videos were analysed using Ethovision XT7 tracking software  
229 (Noldus, Leesberg, USA), except for shoaling analysis (see below).

230 For the open field test, fish swimming was recoded in a round tank  
231 (16.3 cm diameter, 8 cm water depth) for 6 min after 2 minutes acclimatization

232 time. The software calculated the total distance moved and the average  
233 velocity of fish.

234 For the light/dark test, a tank (10 cm x 20 cm, 8 cm water depth) was  
235 illuminated from below with half of the area blocked from the light. The time  
236 spent in the illuminated area was recorded in the 6 minutes immediately  
237 following placement of the fish.

238 For the novel tank, test fish were placed in a tank 23 cm x 6 cm, 12 cm  
239 water depth, divided into three 4 cm zones) and their time spent in the  
240 different depth zones recorded for 6 minutes immediately after the fish were  
241 placed.

242 For the shoaling test, groups of four fish of either sex were placed into  
243 a large tank (45.5 cm x 25 cm, water depth 8 cm) and their swimming  
244 recorded for 6 min after 2 min of acclimatization time. Fish were  
245 simultaneously tracked and the pairwise Euclidean distance between each  
246 pair of fish determined and averaged per frame using commercially available  
247 Actual Track software (Actual Analytics, Edinburgh).

248 To test mating success, pairs of fish were placed into mating tanks  
249 (17.5 cm x 10 cm, water depth 6 cm) with a transparent divider in the evening.  
250 The next morning the divider was pulled at lights-on and the fish were allowed  
251 to breed for 1 hour. Each pair was bred 4 times every other day. Numbers of  
252 fertilized eggs in the clutch and the percentage of successful matings were  
253 recorded. A mating attempt was scored as successful, when fertilised eggs  
254 were produced.

255

256 Statistical analyses

257           Quantitative data were tested for normality (Shapiro-Wilk test, \* $p < 0.05$ )  
258 and heteroscedasticity (Levene's test, \* $p < 0.05$ ) to determine types of  
259 statistical comparisons. Variability of values is always given as SEM.  
260 Statistical significance was determined using Student's t-test for parametric  
261 data (with Welch's correction for heteroscedastic data) or Mann-Whitney U-  
262 test for nonparametric data. For multiple comparisons, we used one-way  
263 ANOVA with Bonferroni's post-hoc test for parametric homoscedastic data,  
264 one-way ANOVA with Welch's correction and Games-Howell post-hoc test for  
265 heteroscedastic data, and Kruskal-Wallis test with Dunn's post-test for  
266 nonparametric data. The shape of distributions was assessed using a  
267 Kolmogorov-Smirnov test (Fig.10). Randomisation was performed by  
268 alternating allocation of fish between control and treatment groups. No  
269 experimental animals were excluded from analysis. All relevant data are  
270 available from the authors.  
271  
272

273 RESULTS

274

275 Intraventricular injection of 6OHDA ablates specific populations of  
276 dopaminergic neurons and locally activates microglia.

277 To ablate dopaminergic and noradrenergic (Th<sup>+</sup>) neurons in the  
278 absence of damage to tissue and ERG processes, we established an ablation  
279 paradigm that relies on intraventricular injections of 6OHDA. Of the  
280 quantifiable Th<sup>+</sup> cell populations in the brain<sup>33</sup>, we found no effect of 6OHDA  
281 injection on cell numbers in populations 2, 7, 9, 10, 13 and 15/16 (data not  
282 shown). However, there was a 51% loss in population 5/6 (control: 484 ± 24  
283 cell profiles; 6OHDA: 235 ± 14 cell profiles), 19% loss of TH<sup>+</sup> cells in  
284 population 11 (288 ± 12 in controls vs. 234 ± 16 in treated), 96% in population  
285 12 (28 ± 1 in controls vs. 1 ± 0 in treated) and complete loss of noradrenergic  
286 neurons in the locus coeruleus (LC; 18 ± 1 in controls vs. zero in treated; Fig.  
287 1A,B). Higher doses of 6OHDA did not increase loss of Th<sup>+</sup> cells (data not  
288 shown). Consistent with Th<sup>+</sup> cell loss, we found a 45% reduction in dopamine  
289 levels, but no effect on serotonin or its metabolites after 6OHDA injection in  
290 the whole brain by HPLC (Fig. 1E). There were no obvious correlations  
291 between the distance of neurons from the injection site or morphology of the  
292 neurons and rates of ablation (see Fig 1A). Hence, we devised an ablation  
293 paradigm in which neurons in populations 5/6, 11, 12 and the LC were  
294 selectively vulnerable to 6OHDA.

295 To determine whether 6OHDA injections led to specific death of Th<sup>+</sup>  
296 neurons and activation of an immune response, we combined TUNEL  
297 labelling and immunohistochemistry for microglia using the 4C4 antibody,

298 which selectively labels microglial cells<sup>34,37</sup> in a reporter fish for dopaminergic  
299 neurons (*dat:GFP*)<sup>28</sup> at 12 h post-injection. This indicated selective  
300 appearance of TUNEL<sup>+</sup>/*dat:GFP*<sup>+</sup> profiles in the vulnerable populations, but  
301 not in the non-ablated populations or in areas not labelled by the transgene.  
302 Moreover, the density of microglial cells was selectively increased in these  
303 areas and some microglial cells engulfed TUNEL<sup>+</sup>/*dat:GFP*<sup>+</sup> profiles,  
304 indicating activation of microglia (Fig. 1C,D; see also Fig. 8A for localised  
305 microglia reaction after 6OHDA treatment). Hence, 6OHDA only leads to  
306 death of circumscribed dopaminergic cell populations and elicits a localised  
307 microglial response.

308

309 Cell replacement and reinnervation patterns differ between  
310 dopaminergic cell populations.

311 To analyse whether lost Th<sup>+</sup> neurons were replaced, we assessed Th<sup>+</sup>  
312 cell numbers relative to controls without ablation for up to 540 days (1.5  
313 years) post-injection of the toxin (dpi). The relatively small loss of cells in  
314 population 11 was compensated for at 42 dpi (not shown). In population 5/6,  
315 numbers were increased compared to 2 dpi, but were still lower than in  
316 controls by 42 dpi. However, at 180 dpi Th<sup>+</sup> cell numbers were even slightly  
317 increased over controls. At 540 dpi numbers were similar to age-matched  
318 controls (Fig. 2A-E). In contrast, in population 12 and the LC, Th<sup>+</sup> neuron  
319 numbers were never fully recovered. There was a small and transient  
320 recovery in cell numbers in these populations at 42 dpi, but by 540 dpi there  
321 were hardly any neurons present in population 12 and the LC (Fig. 2F-O).

322 This indicates differential potential for cell replacement for different  
323 populations of dopaminergic neurons.

324 To determine whether restored dopaminergic neurons re-innervated  
325 their former target areas, we analysed a terminal field ventral to the  
326 predominantly locally projecting population 5/6<sup>10</sup>, which showed regeneration  
327 of cell bodies. After ablation, the density of Th<sup>+</sup> innervation of this terminal  
328 field, measured semi-quantitatively by relative labelling intensity, was  
329 significantly reduced, compared to controls. This was still the case at 180 dpi,  
330 even though cell replacement had been almost completed by 42 days dpi.  
331 However, at 540 dpi, the axon density in 6OHDA-injected fish appeared not  
332 different from that in vehicle-injected controls anymore. This suggests slow  
333 restoration of local projections (Fig. 3A-E).

334 Since population 12 and the LC, which show little cell replacement,  
335 provide all Th<sup>+</sup> innervation to the spinal cord<sup>12-14</sup>, we assessed innervation of  
336 Th<sup>+</sup> axons of the spinal cord. In animals without ablation, we always observed  
337 Th<sup>+</sup> axons in the spinal cord at a midthoracic level (n = 26). Between 2 and  
338 540 dpi, these axons were extremely rare in the spinal cord in 6OHDA  
339 injected animals (Fig. 3F-H). Hence the Th<sup>+</sup> projection to the spinal cord was  
340 ablated by 6OHDA treatment and not regenerated.

341

342 Capacity for enhanced addition of new dopaminergic neurons after  
343 ablation correlates with presence of constitutive neurogenesis for different  
344 populations

345 To determine how dopaminergic neurons were replaced after ablation,  
346 we assessed whether neurogenesis of dopaminergic neurons could be

347 observed and whether ablation of dopaminergic neurons changed generation  
348 rates. To that aim, we injected EdU daily for 7 days after 6OHDA injection, to  
349 maximise progenitor labelling. We analysed the number of Th<sup>+</sup>/EdU<sup>+</sup> neurons  
350 at 6 weeks post-injection, allowing sufficient time for differentiation of Th<sup>+</sup>  
351 neurons (Fig. 4A). Even in the non-ablated situation, a low number of double-  
352 labelled neurons was observed in populations that were capable of neuron  
353 replacement, that is in populations 5/6, 8, and 11 (Fig. 4B,E-G). This indicates  
354 that dopaminergic neurons are constantly added to specific populations at a  
355 low rate.

356         After ablation, the number of double-labelled cells was increased  
357 4.9fold in population 5/6 (Fig. 4C,D,E), compared to sham-injected animals.  
358 This was statistically significant. A similar non-significant trend was present in  
359 populations 8 and 11 (Fig. 4F,G). Hence, ablation of Th<sup>+</sup> cells increases the  
360 rate of addition of new neurons to regenerating populations.

361         In contrast, in population 12 and the LC, which did not show strong  
362 replacement of Th<sup>+</sup> neurons after 6OHDA injection in our histological analysis  
363 above, we did also not observe EdU<sup>+</sup>/Th<sup>+</sup> neurons without or with ablation  
364 (Fig. 4H,I). Hence, differences in Th<sup>+</sup> neuron replacement capacity correlate  
365 with differences in constitutive neurogenesis for distinct populations.

366

### 367         New dopaminergic neurons are derived from ERGs

368         New Th<sup>+</sup> cells are likely derived from local ERGs. The ventricle close to  
369 the 5/6 population is lined by cells with radial processes spanning the entire  
370 thickness of the brain. Most of these cells are labelled by *gfap*:GFP, indicating  
371 their ERG identity<sup>23</sup>, and Th<sup>+</sup> cells are located close to ERG processes (Fig.



372 5A,B). Using PCNA labelling, we find that some of ERGs proliferate in the  
373 untreated brain, consistent with a function in maintaining dopaminergic and  
374 other cell populations (Fig. S3E,F).

375 To determine whether new Th<sup>+</sup> cells are derived from ERGs, we used  
376 genetic lineage tracing with a *Tg(-3her4.3:Cre-ERT2) x Tg(actb2:LOXP-*  
377 *mCherry-LOXP-EGFP)* double-transgenic fish<sup>30</sup>. In this fish, tamoxifen-  
378 inducible Cre is driven by the regulatory sequences of the *her4.3* gene. *her4.3*  
379 is specifically expressed in zebrafish ERGs<sup>38</sup>. The second transgene leads to  
380 expression of GFP in ERGs and their progeny after Cre-recombination. We  
381 found a strong overlap between *gfap*:GFP and *her4.3*:mCherry labelling,  
382 indicating that the driver targets the appropriate cell population (Fig. 5F).

383 We incubated animals in tamoxifen for 6 days to induce recombination  
384 in ERGs, injected 6OHDA and waited for another 42 days for histological  
385 analysis. In animals without previous tamoxifen application, we did not  
386 observe any GFP<sup>+</sup> cells. In tamoxifen-incubated animals, mostly ERGs were  
387 labelled at different densities, indicating variable recombination rates. In  
388 animals in which high recombination rates were achieved, we found GFP<sup>+</sup>/Th<sup>+</sup>  
389 cells after the chase period, indicating that ERGs gave rise to dopaminergic  
390 neurons (Fig. 5C-E). However, we cannot exclude additional sources for new  
391 Th<sup>+</sup> neurons that might be active during physiological or ablation-induced  
392 addition of these neurons.

393

394 *ERG proliferation is increased following ablation of dopaminergic*  
395 *neurons*

396 To investigate whether ablation of dopaminergic neurons would lead to  
397 increased proliferation of ERGs, we determined EdU incorporation rates for  
398 different ERG populations (injected at 11 dpi and detected at 13 dpi; Fig.  
399 6A,B). In the vicinity of the 5/6 population, most ERGs express *gfap*. Some of  
400 these co-express *olig2* and some express only *olig2*, as indicated by reporter  
401 fish double-transgenic for *gfap:GFP* and *olig2:DsRed* (Fig. 6D,E). ERGs that  
402 were only *gfap:GFP*<sup>+</sup> showed increased rates of EdU incorporation after  
403 6OHDA injection (Fig. 6F). Whereas ERGs that were only *olig2:DsRed*<sup>+</sup>  
404 showed a similar trend (Fig. 6G), double-labelled ERGs did not show any  
405 6OHDA-induced effect on proliferation (Fig. 6H). This indicates heterogeneity  
406 in the sensitivity of different ERG populations to dopaminergic cell ablation.

407 To test whether reduced levels of dopamine after cell ablation (cf. Fig  
408 1D) might trigger the increase in ERG proliferation, as in the salamander  
409 midbrain<sup>8</sup>, we used extensive (see Material and Methods) injections of the  
410 dopamine D2-like receptor antagonist Haloperidol, which is effective in  
411 zebrafish<sup>18</sup>, to mimic reduced dopamine levels in animals without ablation.  
412 However, this did not increase ventricular proliferation compared to sham-  
413 injected control animals (Fig. S2A-C), suggesting the possibility that reduced  
414 dopamine levels may not be sufficient to trigger progenitor cell proliferation.  
415 Taken together, the above observations support a scenario in which ablation  
416 of Th<sup>+</sup> cells leads to enhanced generation of Th<sup>+</sup> neurons mainly from  
417 *gfap:GFP*<sup>+</sup> ERGs.

418

419 Regeneration of Th<sup>+</sup> cells depends on immune system activation

420 To test whether the observed activation of microglial cells (cf. Fig. 1C)  
421 was necessary for Th<sup>+</sup> cell regeneration, we inhibited the immune reaction  
422 using dexamethasone bath application<sup>23</sup>. qRT-PCR for principal pro-  
423 inflammatory cytokines *il-1beta* and *tnf-alpha* on horizontal brain sections  
424 comprising population 5/6, showed an ablation-induced increase in the  
425 expression of these cytokines in control fish that was consistent with the  
426 morphological activation of microglia. This increase was completely inhibited  
427 in the presence of dexamethasone, indicating that treatment was efficient  
428 (Fig. 6C).

429 Next, we determined if ERG proliferation was affected by  
430 dexamethasone incubation (for 14 days post-injection of 6OHDA, directly  
431 followed by analysis). Dexamethasone had no effect on proliferation rates of  
432 any ERG subtype in sham-injected controls, indicating that it did not influence  
433 ERG proliferation directly. In contrast, increased proliferation rates in only  
434 *gfap:GFP*<sup>+</sup> ERGs of animals injected with 6OHDA were reduced to those seen  
435 in constitutive proliferation. This was statistically significant (Fig. 6F). ERGs  
436 that were only *olig2:DsRed*<sup>+</sup> showed a similar trend (Fig. 6G). This showed  
437 that only ablation-induced proliferation of *gfap:GFP*<sup>+</sup> ERGs depended on  
438 immune system activation.

439 To determine whether this early suppression of the immune response  
440 had consequences for the addition of newly generated Th<sup>+</sup> cells to population  
441 5/6, we incubated animals with dexamethasone for 14 days after ablation and  
442 analysed Th<sup>+</sup> neuron addition at 42 days after ablation. This showed lower  
443 numbers of Th<sup>+</sup>/EdU<sup>+</sup> neurons and lower overall numbers of Th<sup>+</sup> neurons

444 compared to 6OHDA treated animals without dexamethasone treatment (Fig.  
445 7A-E).

446 Next we asked whether dexamethasone treatment would reduce  
447 addition of new Th<sup>+</sup> neurons that are constitutively added to the 5/6 population  
448 in the absence of ablation. Incubating fish with dexamethasone without  
449 6OHDA injection did not alter the number of new Th<sup>+</sup> neurons (Fig. S1A-E).  
450 The effect of dexamethasone on Th<sup>+</sup> neuron addition only after 6OHDA  
451 treatment matched the effects of dexamethasone on ERG progenitor  
452 proliferation.

453 Hence, dexamethasone treatment early after ablation led to reduced  
454 rates of ERG proliferation and later Th<sup>+</sup> neuron addition to population 5/6. This  
455 shows that most of regenerative neurogenesis depends on immune system  
456 activation.

457

458 Augmenting the immune response enhances ERG proliferation, but not  
459 dopaminergic neuron regeneration

460 To determine whether the immune response was sufficient to induce  
461 dopaminergic cell generation and could be augmented to boost regeneration  
462 we used Zymosan A injections into the ventricle, compared to sham-injected  
463 controls and 6OHDA injection<sup>23</sup>. 6OHDA injection only led to local increase of  
464 4C4 immunoreactivity, e.g. in the 5/6 population (Fig. 8A). In contrast,  
465 Zymosan injection led to a strong general increase in immunoreactivity for the  
466 microglia marker 4C4 that lasted for at least 3 days (Fig. 8A). Hence Zymosan  
467 injections can be used to boost the inflammatory reaction.

468           Without prior ablation of Th<sup>+</sup> neurons, Zymosan injections led to  
469 increased proliferation of only *gfap*:GFP<sup>+</sup> and only *olig2*:DsRed<sup>+</sup> ERGs, but  
470 not of double-labelled ERGs, compared to untreated controls (Zymosan A  
471 injections at day 5 and 10 after 6OHDA injection, EdU application at 11 days  
472 post-injection, analysis at 13 days post-injection; Fig. 8B-G). After 6OHDA-  
473 mediated cell ablation, Zymosan treatment showed a trend to further enhance  
474 proliferation of only *gfap*:GFP<sup>+</sup> ERGs compared to fish only treated with  
475 6OHDA (Fig. 8E). However, this relatively weak additive effect was not  
476 statistically significant. Hence, Zymosan increased proliferation of mainly  
477 *gfap*:GFP<sup>+</sup> ERGs independently of an ablation, and potentially slightly  
478 increased proliferation beyond levels induced by 6OHDA treatment alone.

479           To dissect whether the effect of immune system stimulation on ERG  
480 proliferation may have been mediated by the leukotriene LTC<sub>4</sub>, as in the  
481 mechanically injured telencephalon<sup>23</sup>, we injected animals with the  
482 compound. This elicited a weak microglia response after 3 daily injections, as  
483 shown by 4C4 immunohistochemistry, but proliferation of ERGs was not  
484 altered (Fig. S3A,B). This suggests possible brain region-specific mechanisms  
485 of ERG proliferation.

486           To determine whether the increased ERG proliferation observed after  
487 Zymosan treatment alone would lead to generation of supernumerary Th<sup>+</sup>  
488 neurons, we determined numbers of EdU<sup>+</sup>/Th<sup>+</sup> and overall numbers of Th<sup>+</sup>  
489 neurons at 42 days after a sham injection followed by two injections of  
490 Zymosan at 5 and 10 dpi. We did not observe any changes in these  
491 parameters (Fig. S1A-E), indicating that additional mechanisms may control  
492 dopaminergic differentiation of new cells.

493 To investigate whether Zymosan treatment was able to improve  
494 regeneration of Th<sup>+</sup> neurons after ablation, we analysed the number of  
495 EdU<sup>+</sup>/Th<sup>+</sup> and the total number of Th<sup>+</sup> neurons after 6OHDA induced ablation,  
496 followed by Zymosan treatment, in the same experimental timeline as above.  
497 We did not observe any changes in EdU<sup>+</sup>/Th<sup>+</sup> and overall numbers of Th<sup>+</sup>  
498 cells compared to animals that only received 6OHDA injections (Fig. 9A-E).  
499 Hence, Zymosan treatment was sufficient to increase ERG proliferation but  
500 insufficient to boost regeneration of Th<sup>+</sup> neurons.

501

#### 502 Ablation of dopaminergic neurons leads to specific functional deficits

503 To determine whether loss of Th<sup>+</sup> neurons had consequences for the  
504 behaviours of the fish, and whether these would be recovered after  
505 regeneration, we first recorded individual swimming activity in a round arena  
506 of fish that received 6OHDA injections and sham injections at 7 days after  
507 ablation. No differences were observed in the distance moved and velocity  
508 (average and frequency distribution) or the preference of fish for the periphery  
509 or inner zone of the arena (Fig. 10A-C and not shown) during the 6 minute  
510 observation period. This indicated that swimming capacity and patterns were  
511 not overtly affected by the ablation.

512 We used tests of anxiety-like behaviours, namely the novel tank test, in  
513 which fish initially prefer to stay at the bottom of the unfamiliar new tank, and  
514 the light/dark choice test<sup>39-41</sup>, in which fish stay most of the time in the dark  
515 compartment. Indeed, fish in all groups showed strong preferences for the  
516 bottom of the tank or the dark compartment, respectively, indicating the  
517 expected behaviours. However, fish did not show any differences in behaviour

518 after 6OHDA induced ablation of Th<sup>+</sup> neurons (Fig. 10D-G). Hence, we could  
519 not detect effects of Th<sup>+</sup> cell ablation on anxiety-like behaviours.

520 To test movement coordination, we analysed shoaling behaviour of the  
521 fish. Putting 4 fish together into a tank lets them exhibit shoaling, a natural  
522 behaviour to swim close to their conspecifics<sup>42</sup>. This behaviour requires  
523 complex sensory-motor integration to keep the same average distance from  
524 each other. We found that shoals made up of fish treated with 6OHDA swam  
525 at an average inter-individual distance that was twice as large as that in  
526 control shoals at 7, 42 and 180 days post-injection (Fig. 11A,B). Hence  
527 ablation of Th<sup>+</sup> neurons impaired shoaling behaviour and this behaviour was  
528 not recovered within 180 days dpi.

529 We reasoned that if manoeuvring of fish was impaired by ablation of  
530 specific Th<sup>+</sup> cells, mating behaviour, which requires coordinated swimming of  
531 a male and female, might also be affected. Alternatively, reproductive  
532 functions could directly be influenced by dopamine<sup>43</sup>. Indeed, ablation of Th<sup>+</sup>  
533 cells in both male and females led to a reduced rate of successful matings  
534 and 84% fewer fertilised eggs laid than in control pairs over four mating  
535 events. Combining the same control females with the 6OHDA treated males  
536 and vice versa allowed intermediate egg production and mating success in  
537 both groups, indicating that male or female reproductive functions were not  
538 selectively affected (Fig. 11C-E). Hence, mating success was only strongly  
539 impaired when both males and females lacked specific Th<sup>+</sup> neurons. This  
540 supports the notion that swimming coordination was permanently affected by  
541 the lack of regeneration in population 12 and the LC.

542

543 DISCUSSION

544 Our results show that after ablation, Th<sup>+</sup> neurons in some populations  
545 are replaced by newly formed neurons. Th<sup>+</sup> neurons are derived from specific  
546 ERGs, which increase proliferation after ablation in the adult zebrafish brain.  
547 This regeneration depends on immune system activation. In contrast, Th<sup>+</sup>  
548 neuron populations with long spinal projections only show sparse and  
549 transient replacement of neurons and never recover their spinal projections.  
550 Consequently, deficits in shoaling and mating behaviours associated with  
551 these anatomical defects never recover (schematically summarized in Fig.  
552 12).

553

554 *Th<sup>+</sup> neurons are regenerated from specific ERG progenitors after*  
555 *ablation*

556 We observed a regenerative response after ablation of a subset of Th<sup>+</sup>  
557 neurons, defined by an increased number of Th<sup>+</sup> cells and ERGs labelled with  
558 a proliferation marker. Genetic lineage tracing showed that ERGs gave rise to  
559 at least some new Th<sup>+</sup> neurons. However, we cannot exclude contributions  
560 from unknown progenitors or trans-differentiation of other neurons as a source  
561 for new dopaminergic neurons. Hence, ablation of Th<sup>+</sup> neurons is sufficient to  
562 elicit a regenerative reaction in ERG progenitor cells and protracted  
563 replacement of Th<sup>+</sup> neurons.

564 Not all diencephalic ERGs may take part in regenerative neurogenesis  
565 of dopaminergic neurons. We find previously unreported heterogeneity in  
566 gene expression and proliferative behaviour. While *gfap:GFP<sup>+</sup>* (overlapping  
567 with the ERGs labelled by genetic lineage tracing) and *olig2:DsRed<sup>+</sup>* ERGs



568 showed changes in proliferation in response to ablation or immune signal  
569 manipulation, those that expressed both transgenes were not altered in their  
570 proliferation rates by any of these manipulations, indicating that only specific  
571 ERGs may act as progenitor cells in a regeneration context.

572         In previous ablation experiments in larvae, different observations were  
573 made depending on the ablated cell populations. Either enhanced proliferation  
574 and replacement of neurons<sup>44</sup> or no reaction and long-term reduction in  
575 neuron number<sup>45</sup> has been reported. This underscores our findings that  
576 different populations of dopaminergic neurons are not regenerated to the  
577 same extent, even in larvae that show higher general proliferative activity than  
578 adults. Our observation supports that loss of Th<sup>+</sup> cells leads to increased  
579 proliferation of progenitor cells and replacement of specific dopaminergic  
580 neuron populations.

581

582         *The immune response is necessary for regeneration of Th<sup>+</sup> cells*

583         We find that inhibiting the immune response after ablation leads to  
584 reduced proliferation in the ventricular zone and fewer new Th<sup>+</sup> neurons.  
585 Interestingly, only ablation-induced ERG proliferation was affected by this  
586 treatment, consistent with findings for the zebrafish telencephalon<sup>23</sup>. It has  
587 been proposed that different molecular mechanisms are involved in  
588 constitutive and regenerative neurogenesis<sup>46</sup>. However, the immune-mediator  
589 LTC<sub>4</sub>, reported to promote the immune-dependent progenitor proliferation in  
590 the zebrafish telencephalon<sup>23</sup>, did not elicit proliferation of ERGs in our  
591 experiments in the diencephalon, suggesting regional differences of immune  
592 to ERG signalling.

593           Alternatively, ERGs could be de-repressed in their activity by the  
594 observed reduction of dopamine levels in the brain. This has been  
595 demonstrated to be the case in the midbrain of salamanders<sup>8</sup>. However,  
596 injecting haloperidol into untreated fish to mimic reduced levels of dopamine  
597 after ablation did not lead to increased ERG proliferation in the brain of  
598 zebrafish. This points to potential species-specific differences in the control of  
599 progenitor cell proliferation between zebrafish and salamanders.

600           Remarkably boosting the immune reaction with Zymosan was sufficient  
601 to enhance ERG proliferation, but was insufficient to increase number of new  
602 Th<sup>+</sup> neurons in animals with and without prior ablation of Th<sup>+</sup> neurons. This  
603 suggests that additional factors, not derived from the immune system, may be  
604 necessary for Th<sup>+</sup> neuron differentiation and replacement.

605

606           *What are the reasons for differential regeneration of dopaminergic*  
607 *neuron populations?*

608           Constitutive neurogenesis we observe in specific brain nuclei  
609 correlates with regenerative success. For example, there is ongoing addition  
610 of Th<sup>+</sup> cells in the regeneration-competent 5/6 population without any ablation,  
611 but this is not detectable in the non-regenerated populations 12 and LC. We  
612 speculate that in brain nuclei that constitutively integrate new neurons, factors  
613 that support integration of new neurons, such as neurotrophic factors and  
614 axon guidance molecules might be present, whereas these could have been  
615 developmentally down-regulated in populations that do not add new neurons  
616 in adults. Integration promoting factors may be rate-limiting for regeneration.

617           Alternatively, new neurons may fail to integrate into the network and  
618 perish. This may be pronounced for population 12 and the LC, which show  
619 complex axon projections<sup>10</sup>. Some dopaminergic cells managed to repopulate  
620 population 12 and LC, but they did not persist. These populations have  
621 neurons with particularly long axons that are led by complex guidance  
622 molecule patterns, e.g. to the spinal cord during development<sup>47</sup>. These  
623 patterns may have disappeared in adults and thus explain failure of these  
624 neurons to re-innervate the spinal cord. Some long-range axons can  
625 successfully navigate the adult zebrafish brain, such as regenerating optic  
626 axons<sup>48</sup>, but particular populations of axons descending to the spinal cord do  
627 not readily regenerate<sup>49,50</sup>. This correlates with constitutive neurogenesis in  
628 the optic system, but not in the descending brainstem projection.

629

630           *Specific ablation of circumscribed Th<sup>+</sup> populations offers clues to their*  
631 *function*

632           The long-lasting loss of about 28 dopaminergic neurons in population  
633 12 and of 18 noradrenergic neurons in the LC is associated with highly  
634 specific functional deficits in shoaling and mating, but not overall locomotion  
635 or anxiety-like behaviours. Previous studies showed reduced overall  
636 locomotion after application of 6OHDA in adult zebrafish. However, in these  
637 studies, application routes were different, creating larger ablation in the brain<sup>7</sup>  
638 or peripheral rather than central lesions<sup>51</sup>.

639           Among the lost neurons, population 12 contains the neurons that give  
640 rise to the evolutionarily conserved diencephalo-spinal tract, providing the  
641 entire dopaminergic innervation of the spinal cord in most vertebrates<sup>10</sup>. Loss

642 of this tract in larval zebrafish leads to hypo-locomotion, due to a reduction in  
643 the number of swimming bouts<sup>16,17</sup>. Large scale ablation of diencephalic  
644 dopaminergic neurons in larvae also led to motor impairments<sup>52</sup>. We  
645 speculate that in adults, dopamine in the spinal cord, which is almost  
646 completely missing after ablation, may modulate initiation of movement  
647 changes necessary for efficient shoaling and mating behaviour. However,  
648 descending dopaminergic projections also innervate the sensory lateral line  
649<sup>17,53</sup>. Altered sensation of water movements could thus also contribute to  
650 impaired ability to manoeuvre. Moreover, population 12 neurons have  
651 ascending projections<sup>10</sup> that could also be functionally important. We can also  
652 not exclude that some ablated dopaminergic neurons escaped our analysis  
653 but contributed to functional deficits.

654 Altered shoaling behaviour<sup>54</sup> and anxiety-like behaviour<sup>19,20</sup> has  
655 previously been correlated with alterations of the dopaminergic system, but  
656 not pinpointed to specific neuronal populations. Our results support that the  
657 fewer than 50 neurons that form the descending dopaminergic and  
658 noradrenergic projections are involved in shoaling behaviour, but not anxiety-  
659 like behaviour, as has been found for global manipulations of dopamine<sup>55</sup>.

660 Dopamine-dependent behaviours can be recovered following  
661 regeneration of dopaminergic neurons. For example, in larval zebrafish,  
662 swimming frequency is normalised again after ablation and regeneration of  
663 hypothalamic dopaminergic neurons<sup>44</sup>. In salamanders, amphetamine-  
664 inducible locomotion is recovered, correlated with regeneration of Th<sup>+</sup> neurons  
665 after 6OHDA-mediated ablation<sup>56</sup>. Here we show that regeneration of specific  
666 Th<sup>+</sup> neurons that project to the spinal cord is surprisingly limited in adult

667 zebrafish and not functionally compensated, which leads to permanent  
668 functional deficits in a generally regeneration-competent vertebrate.

669

670 *Conclusion*

671 Specific Th<sup>+</sup> neuronal populations in adult zebrafish show an  
672 unexpected heterogeneity in their capacity to be regenerated from specific  
673 progenitor populations. This system is useful to dissect mechanisms of  
674 successful and unsuccessful functional neuronal regeneration in the same  
675 model, and we show here that the immune response is critical for  
676 regeneration. Ultimately, manipulations of immune mechanisms in conjunction  
677 with pro-differentiation factors may be used to activate pro-regenerative  
678 mechanisms also in mammals to lead to generation and functional integration  
679 of new dopaminergic neurons.

680

681 ACKNOWLEDGEMENTS

682 We thank Drs Bruce Appel, Marc Ekker, Daniel Goldman, and Pamela  
683 Raymond for transgenic fish, Joe Finney for data analysis and Stephen West  
684 for discussions. Supported by BBSRC (BB/M003892/1 to CGB and TB), an  
685 MRC DTG PhD studentship (to NOD), a BBSRC Eastbio PhD studentship (to  
686 LJC), and a grant from Sigrid Juselius Foundation to SS and PP.

687

688 AUTHOR CONTRIBUTION

689 Conceptualization, NOD, LJC, CGB, and TB; Investigation, NOD, LJC, LC,  
690 SAS, KSM, PP and JDA; Writing: CGB, and TB.

691

692 CONFLICT OF INTEREST STATEMENT

693 JDA is the founding director of Actual Analytics Ltd.

694

695 REFERENCES

- 696 1 Jessberger, S. Neural repair in the adult brain. *F1000Research* **5**,  
697 (2016).
- 698 2 Peron, S. & Berninger, B. Reawakening the sleeping beauty in the  
699 adult brain: neurogenesis from parenchymal glia. *Curr Opin Genet Dev*  
700 **34**, 46-53, (2015).
- 701 3 Becker, C. G. & Becker, T. Neuronal regeneration from ependymo-  
702 radial glial cells: cook, little pot, cook! *Dev Cell* **32**, 516-527, (2015).
- 703 4 Ghosh, S. & Hui, S. P. Regeneration of Zebrafish CNS: Adult  
704 Neurogenesis. *Neural plasticity* **2016**, 5815439, (2016).
- 705 5 Alunni, A. & Bally-Cuif, L. A comparative view of regenerative  
706 neurogenesis in vertebrates. *Development* **143**, 741-753, (2016).
- 707 6 Matsui, H. & Sugie, A. An optimized method for counting dopaminergic  
708 neurons in zebrafish. *PLoS One* **12**, e0184363, (2017).
- 709 7 Vijayanathan, Y., Lim, F. T., Lim, S. M., Long, C. M., Tan, M. P.,  
710 Majeed, A. B. A. & Ramasamy, K. 6-OHDA-Lesioned Adult Zebrafish  
711 as a Useful Parkinson's Disease Model for Dopaminergic  
712 Neuroregeneration. *Neurotoxicity research* **32**, 496-508, (2017).
- 713 8 Berg, D. A., Kirkham, M., Wang, H., Frisen, J. & Simon, A. Dopamine  
714 controls neurogenesis in the adult salamander midbrain in homeostasis  
715 and during regeneration of dopamine neurons. *Cell Stem Cell* **8**, 426-  
716 433, (2011).
- 717 9 Tieu, K. A guide to neurotoxic animal models of Parkinson's disease.  
718 *Cold Spring Harbor perspectives in medicine* **1**, a009316, (2011).

- 719 10 Tay, T. L., Ronneberger, O., Ryu, S., Nitschke, R. & Driever, W.  
720 Comprehensive catecholaminergic projectome analysis reveals single-  
721 neuron integration of zebrafish ascending and descending  
722 dopaminergic systems. *Nat Commun* **2**, 171, (2011).
- 723 11 Chen, Y. C., Priyadarshini, M. & Panula, P. Complementary  
724 developmental expression of the two tyrosine hydroxylase transcripts in  
725 zebrafish. *Histochemistry and cell biology* **132**, 375-381, (2009).
- 726 12 McLean, D. L. & Fetcho, J. R. Relationship of tyrosine hydroxylase and  
727 serotonin immunoreactivity to sensorimotor circuitry in larval zebrafish.  
728 *J Comp Neurol* **480**, 57-71, (2004).
- 729 13 McLean, D. L. & Fetcho, J. R. Ontogeny and innervation patterns of  
730 dopaminergic, noradrenergic, and serotonergic neurons in larval  
731 zebrafish. *J Comp Neurol* **480**, 38-56, (2004).
- 732 14 Kuscha, V., Barreiro-Iglesias, A., Becker, C. G. & Becker, T. Plasticity  
733 of tyrosine hydroxylase and serotonergic systems in the regenerating  
734 spinal cord of adult zebrafish. *J Comp Neurol* **520**, 933-951, (2012).
- 735 15 Lambert, A. M., Bonkowsky, J. L. & Masino, M. A. The conserved  
736 dopaminergic diencephalospinal tract mediates vertebrate locomotor  
737 development in zebrafish larvae. *J. Neurosci.* **32**, 13488-13500, (2012).
- 738 16 Thirumalai, V. & Cline, H. T. Endogenous dopamine suppresses  
739 initiation of swimming in pre-feeding zebrafish larvae. *J Neurophysiol*,  
740 (2008).
- 741 17 Jay, M., De Faveri, F. & McDearmid, J. R. Firing dynamics and  
742 modulatory actions of supraspinal dopaminergic neurons during  
743 zebrafish locomotor behavior. *Curr Biol* **25**, 435-444, (2015).



- 744 18 Reimer, M. M. *et al.* Dopamine from the Brain Promotes Spinal Motor  
745 Neuron Generation during Development and Adult Regeneration. *Dev*  
746 *Cell* **25**, 478-491, (2013).
- 747 19 Wang, Y., Li, S., Liu, W., Wang, F., Hu, L. F., Zhong, Z. M., Wang, H. &  
748 Liu, C. F. Vesicular monoamine transporter 2 (Vmat2) knockdown  
749 elicits anxiety-like behavior in zebrafish. *Biochem Biophys Res*  
750 *Commun* **470**, 792-797, (2016).
- 751 20 Tran, S., Nowicki, M., Muraleetharan, A., Chatterjee, D. & Gerlai, R.  
752 Neurochemical factors underlying individual differences in locomotor  
753 activity and anxiety-like behavioral responses in zebrafish. *Prog*  
754 *Neuropsychopharmacol Biol Psychiatry* **65**, 25-33, (2016).
- 755 21 Grandel, H., Kaslin, J., Ganz, J., Wenzel, I. & Brand, M. Neural stem  
756 cells and neurogenesis in the adult zebrafish brain: origin, proliferation  
757 dynamics, migration and cell fate. *Dev Biol* **295**, 263-277, (2006).
- 758 22 Grandel, H. & Brand, M. Comparative aspects of adult neural stem cell  
759 activity in vertebrates. *Dev. Genes Evol.* **223**, 131-147, (2013).
- 760 23 Kyritsis, N., Kizil, C., Zocher, S., Kroehne, V., Kaslin, J., Freudenreich,  
761 D., Iltzsche, A. & Brand, M. Acute inflammation initiates the  
762 regenerative response in the adult zebrafish brain. *Science* **338**, 1353-  
763 1356, (2012).
- 764 24 Ohnmacht, J., Yang, Y. J., Maurer, G. W., Barreiro-Iglesias, A.,  
765 Tsarouchas, T. M., Wehner, D., Sieger, D., Becker, C. G. & Becker, T.  
766 Spinal motor neurons are regenerated after mechanical lesion and  
767 genetic ablation in larval zebrafish. *Development*, (2016).

- 768 25 Westerfield, M. *The zebrafish book: a guide for the laboratory use of*  
769 *zebrafish (Danio rerio)*. 4th edn, (University of Oregon Press, 2000).
- 770 26 Kucenas, S., Takada, N., Park, H. C., Woodruff, E., Broadie, K. &  
771 Appel, B. CNS-derived glia ensheath peripheral nerves and mediate  
772 motor root development. *Nat Neurosci* **11**, 143-151, (2008).
- 773 27 Bernardos, R. L. & Raymond, P. A. GFAP transgenic zebrafish. *Gene*  
774 *Expr Patterns* **6**, 1007-1013, (2006).
- 775 28 Xi, Y., Yu, M., Godoy, R., Hatch, G., Poitras, L. & Ekker, M. Transgenic  
776 zebrafish expressing green fluorescent protein in dopaminergic  
777 neurons of the ventral diencephalon. *Dev Dyn* **240**, 2539-2547, (2011).
- 778 29 Knopf, F., Schnabel, K., Haase, C., Pfeifer, K., Anastassiadis, K. &  
779 Weidinger, G. Dually inducible TetON systems for tissue-specific  
780 conditional gene expression in zebrafish. *Proc. Natl. Acad. Sci. USA*  
781 **107**, 19933-19938, (2010).
- 782 30 Boniface, E. J., Lu, J., Victoroff, T., Zhu, M. & Chen, W. FlEx-based  
783 transgenic reporter lines for visualization of Cre and Flp activity in live  
784 zebrafish. *Genesis* **47**, 484-491, (2009).
- 785 31 Ramachandran, R., Reifler, A., Parent, J. M. & Goldman, D.  
786 Conditional gene expression and lineage tracing of tuba1a expressing  
787 cells during zebrafish development and retina regeneration. *J Comp*  
788 *Neurol* **518**, 4196-4212, (2010).
- 789 32 Skaggs, K., Goldman, D. & Parent, J. M. Excitotoxic brain injury in  
790 adult zebrafish stimulates neurogenesis and long-distance neuronal  
791 integration. *Glia* **62**, 2061-2079, (2014).

- 792 33 Sallinen, V., Torkko, V., Sundvik, M., Reenila, I., Khrustalyov, D.,  
793 Kaslin, J. & Panula, P. MPTP and MPP+ target specific aminergic cell  
794 populations in larval zebrafish. *J Neurochem* **108**, 719-731, (2009).
- 795 34 Ohnmacht, J., Yang, Y., Maurer, G. W., Barreiro-Iglesias, A.,  
796 Tsarouchas, T. M., Wehner, D., Sieger, D., Becker, C. G. & Becker, T.  
797 Spinal motor neurons are regenerated after mechanical lesion and  
798 genetic ablation in larval zebrafish. *Development* **143**, 1464-1474,  
799 (2016).
- 800 35 Barreiro-Iglesias, A., Mysiak, K. S., Scott, A. L., Reimer, M. M., Yang,  
801 Y., Becker, C. G. & Becker, T. Serotonin Promotes Development and  
802 Regeneration of Spinal Motor Neurons in Zebrafish. *Cell Rep* **13**, 924-  
803 932, (2015).
- 804 36 Reimer, M. M., Sorensen, I., Kuscha, V., Frank, R. E., Liu, C., Becker,  
805 C. G. & Becker, T. Motor neuron regeneration in adult zebrafish. *J*  
806 *Neurosci* **28**, 8510-8516, (2008).
- 807 37 Becker, T. & Becker, C. G. Regenerating descending axons  
808 preferentially reroute to the gray matter in the presence of a general  
809 macrophage/microglial reaction caudal to a spinal transection in adult  
810 zebrafish. *J. Comp. Neurol.* **433**, 131-147, (2001).
- 811 38 Kroehne, V., Freudenreich, D., Hans, S., Kaslin, J. & Brand, M.  
812 Regeneration of the adult zebrafish brain from neurogenic radial glia-  
813 type progenitors. *Development* **138**, 4831-4841, (2011).
- 814 39 Blaser, R. & Gerlai, R. Behavioral phenotyping in zebrafish:  
815 comparison of three behavioral quantification methods. *Behav Res*  
816 *Methods* **38**, 456-469, (2006).

- 817 40 Blaser, R. E. & Rosemberg, D. B. Measures of anxiety in zebrafish  
818 (Danio rerio): dissociation of black/white preference and novel tank  
819 test. *PLoS One* **7**, e36931, (2012).
- 820 41 Stewart, A., Gaikwad, S., Kyzar, E., Green, J., Roth, A. & Kalueff, A. V.  
821 Modeling anxiety using adult zebrafish: a conceptual review.  
822 *Neuropharmacology* **62**, 135-143, (2012).
- 823 42 Engeszer, R. E., Ryan, M. J. & Parichy, D. M. Learned social  
824 preference in zebrafish. *Curr Biol* **14**, 881-884, (2004).
- 825 43 Pappas, S. S., Tiernan, C. T., Behrouz, B., Jordan, C. L., Breedlove, S.  
826 M., Goudreau, J. L. & Lookingland, K. J. Neonatal androgen-dependent  
827 sex differences in lumbar spinal cord dopamine concentrations and the  
828 number of A11 diencephalospinal dopamine neurons. *J Comp Neurol*  
829 **518**, 2423-2436, (2010).
- 830 44 McPherson, A. D., Barrios, J. P., Luks-Morgan, S. J., Manfredi, J. P.,  
831 Bonkowsky, J. L., Douglass, A. D. & Dorsky, R. I. Motor Behavior  
832 Mediated by Continuously Generated Dopaminergic Neurons in the  
833 Zebrafish Hypothalamus Recovers after Cell Ablation. *Curr Biol* **26**,  
834 263-269, (2016).
- 835 45 Godoy, R., Noble, S., Yoon, K., Anisman, H. & Ekker, M.  
836 Chemogenetic ablation of dopaminergic neurons leads to transient  
837 locomotor impairments in zebrafish larvae. *J Neurochem* **135**, 249-260,  
838 (2015).
- 839 46 Kizil, C., Kyritsis, N., Dudczig, S., Kroehne, V., Freudenreich, D.,  
840 Kaslin, J. & Brand, M. Regenerative neurogenesis from neural

- 841 progenitor cells requires injury-induced expression of Gata3. *Dev Cell*  
842 **23**, 1230-1237, (2012).
- 843 47 Kasthuber, E., Kern, U., Bonkowsky, J. L., Chien, C. B., Driever, W.  
844 & Schweitzer, J. Netrin-DCC, Robo-Slit, and heparan sulfate  
845 proteoglycans coordinate lateral positioning of longitudinal  
846 dopaminergic diencephalospinal axons. *J Neurosci* **29**, 8914-8926,  
847 (2009).
- 848 48 Wyatt, C., Ebert, A., Reimer, M. M., Rasband, K., Hardy, M., Chien, C.  
849 B., Becker, T. & Becker, C. G. Analysis of the astray/robo2 zebrafish  
850 mutant reveals that degenerating tracts do not provide strong guidance  
851 cues for regenerating optic axons. *J. Neurosci.* **30**, 13838-13849,  
852 (2010).
- 853 49 Bhatt, D. H., Otto, S. J., Depoister, B. & Fetcho, J. R. Cyclic AMP-  
854 induced repair of zebrafish spinal circuits. *Science* **305**, 254-258,  
855 (2004).
- 856 50 Becker, T., Bernhardt, R. R., Reinhard, E., Wullmann, M. F., Tongiorgi,  
857 E. & Schachner, M. Readiness of zebrafish brain neurons to  
858 regenerate a spinal axon correlates with differential expression of  
859 specific cell recognition molecules. *J Neurosci* **18**, 5789-5803, (1998).
- 860 51 Anichtchik, O. V., Kaslin, J., Peitsaro, N., Scheinin, M. & Panula, P.  
861 Neurochemical and behavioural changes in zebrafish *Danio rerio* after  
862 systemic administration of 6-hydroxydopamine and 1-methyl-4-phenyl-  
863 1,2,3,6-tetrahydropyridine. *J Neurochem* **88**, 443-453, (2004).

- 864 52 Lam, C. S., Korzh, V. & Strahle, U. Zebrafish embryos are susceptible  
865 to the dopaminergic neurotoxin MPTP. *Eur J Neurosci* **21**, 1758-1762,  
866 (2005).
- 867 53 Bricaud, O., Charar, V., Dambly-Chaudiere, C. & Ghysen, A. Early  
868 efferent innervation of the zebrafish lateral line. *J Comp Neurol* **434**,  
869 253-261., (2001).
- 870 54 Scerbina, T., Chatterjee, D. & Gerlai, R. Dopamine receptor  
871 antagonism disrupts social preference in zebrafish: a strain comparison  
872 study. *Amino Acids* **43**, 2059-2072, (2012).
- 873 55 Kacprzak, V., Patel, N. A., Riley, E., Yu, L., Yeh, J. J. & Zhdanova, I. V.  
874 Dopaminergic control of anxiety in young and aged zebrafish.  
875 *Pharmacology, biochemistry, and behavior* **157**, 1-8, (2017).
- 876 56 Parish, C. L., Beljajeva, A., Arenas, E. & Simon, A. Midbrain  
877 dopaminergic neurogenesis and behavioural recovery in a salamander  
878 lesion-induced regeneration model. *Development* **134**, 2881-2887,  
879 (2007).
- 880
- 881

882

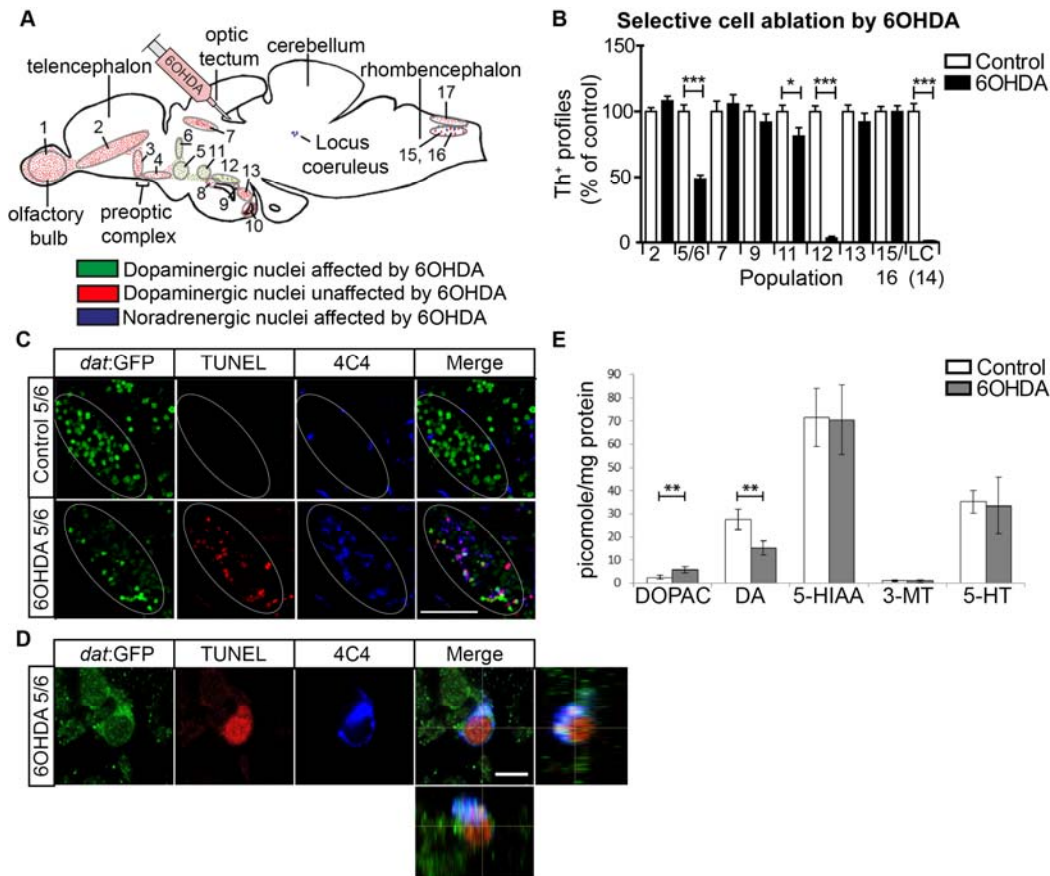

883

884

885 Fig. 1 Specific populations of Th<sup>+</sup> neurons are ablated by 6OHDA. **A:** A  
 886 schematic sagittal section of the adult brain is shown with the 6OHDA  
 887 resistant dopaminergic cell populations (red) and the vulnerable dopaminergic  
 888 (green) and noradrenergic populations (purple) in relation to the injection site  
 889 in the third ventricle indicated. **B:** Quantification of cell loss after toxin injection  
 890 at 2 dpi is shown. **C:** Sagittal sections of population 5/6 are shown in a  
 891 *dat:GFP* transgenic fish. This shows elevated TUNEL and microglia labelling  
 892 in population 5/6 after ablation. Note that areas of elevated TUNEL and  
 893 microglial labelling follow the outlines of the *dat:GFP*+ cell population (ellipse)  
 894 in the 6OHDA treated animals, but not controls, indicating localised labelling.

895 **D:** A high magnification is shown of a TUNEL<sup>+</sup>/*dat*:GFP<sup>+</sup> dopaminergic neuron  
896 that is engulfed by a 4C4<sup>+</sup> microglial process (lateral and orthogonal views).

897 **E:** Injection of the toxin decreases levels of dopamine (DA), increases levels  
898 of the metabolite DOPAC, but leaves serotonin (5-HT) and metabolites (5-  
899 HIAA, 3-MT) unaffected, as shown by HPLC. Student's T-test (with Welch's  
900 correction for heteroscedastic data) and Mann Whitney-U tests were used for  
901 pairwise comparisons in B and D (\*p < 0.05; \*\* p < 0.01; \*\*\* p < 0.001). Bar in  
902 C = 50 μm, in D = 5 μm.

903



904

905

906

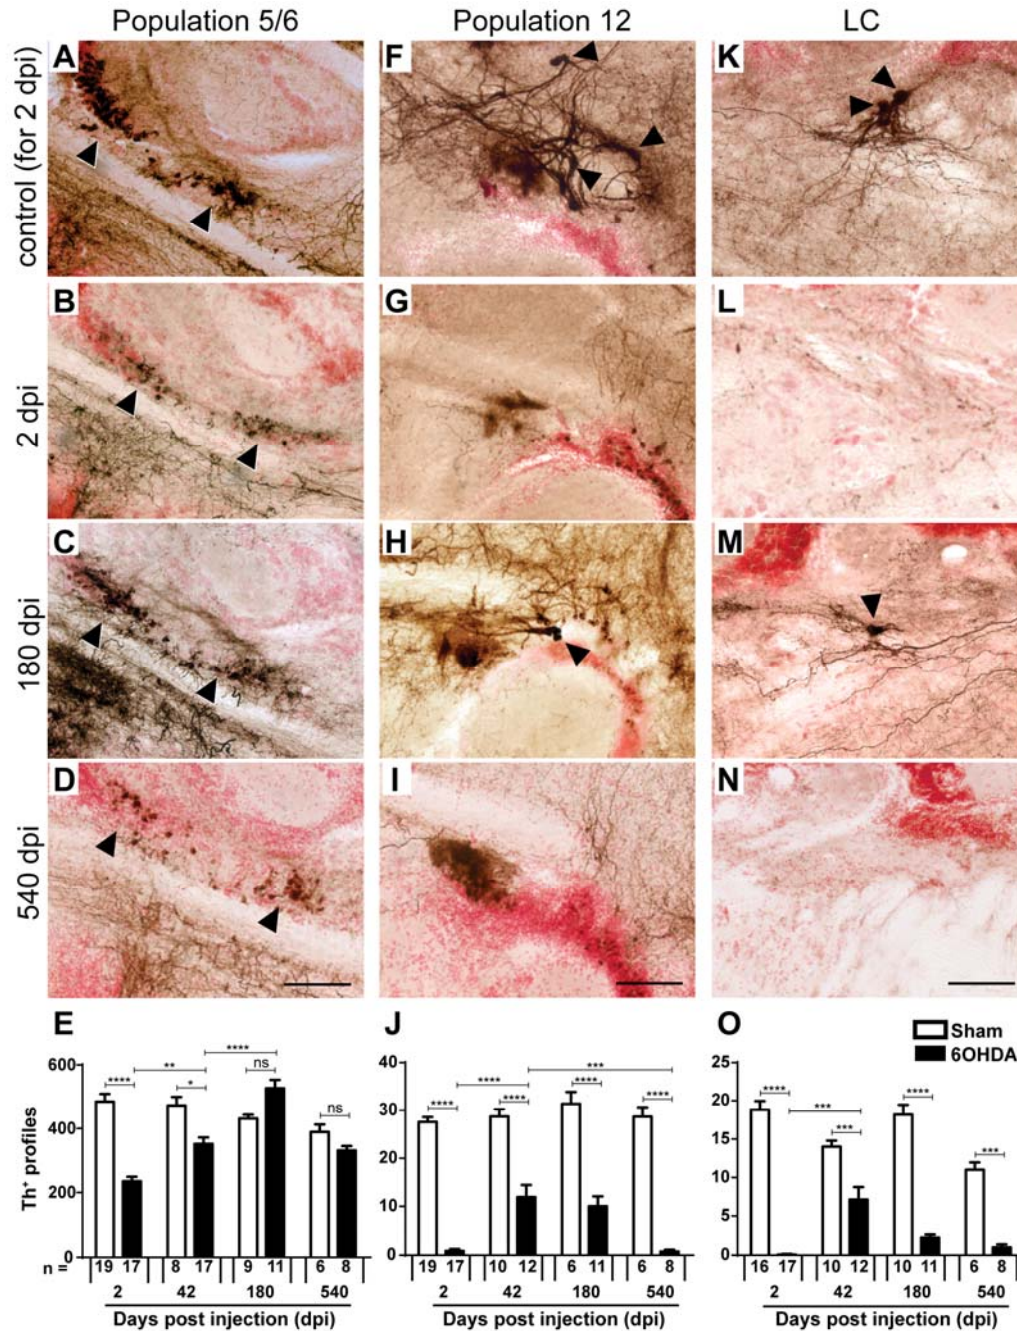

907

908

Fig. 2 Replacement of Th<sup>+</sup> neurons differs between brain nuclei. Sagittal brain

909

sections are shown; dorsal is up, rostral is left. Some Th<sup>+</sup> cell bodies are

910

indicated by arrowheads. **A-E:** In population 5/6 the number of Th<sup>+</sup> cells is

911 reduced after toxin-induced ablation and back to levels seen in controls  
912 without ablation by 180 dpi. **F-J**: In population 12, a partial and transient  
913 recovery in the number of Th<sup>+</sup> cells was observed at 42 dpl. **K-O**: In the LC  
914 there was also a partial and transient recovery of Th<sup>+</sup> cell number. Note that  
915 example photomicrographs of controls are only shown for 2 dpi for clarity  
916 reasons, but all statistics were done with age-matched controls. Two-way  
917 ANOVA ( $p < 0.0001$ ) with Bonferroni post-hoc test ( $*p < 0.05$ ,  $**p < 0.01$ ,  $***p$   
918  $< 0.001$ ,  $****p < 0.0001$ ) for E, J, and O. Bars = 50  $\mu\text{m}$ .  
919

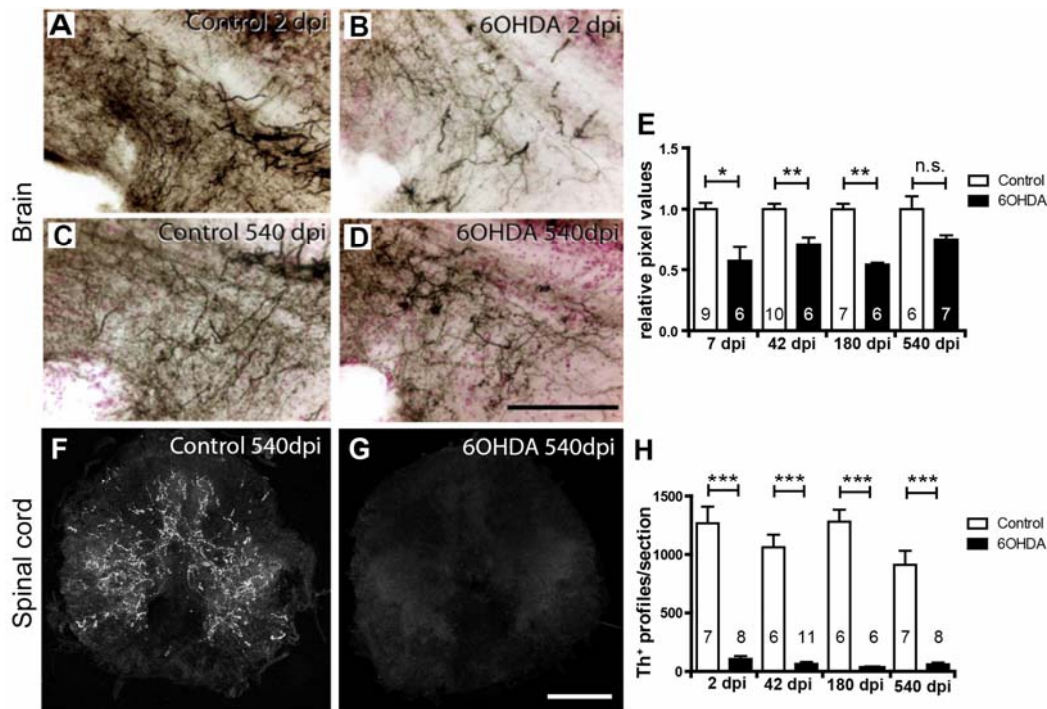

920

921

922

923 Fig. 3 Th<sup>+</sup> axons are inefficiently regenerated. **A-D**: Immunohistochemical  
924 detection of Th<sup>+</sup> axons (black on red counterstain) in sagittal sections through  
925 a terminal field of TH<sup>+</sup> axons ventral to population 5/6 is shown. Compared to  
926 controls (A), density of these axons is reduced at 2 dpi (B), and is more  
927 similar to age-matched controls (C,D) at 540 dpi. **E**: Semi-quantitative  
928 assessment of labelling intensity in the area depicted in D-G indicates  
929 significant loss of innervation at all time points except the latest, 540 dpi. **F,G**:  
930 Spinal cross sections are shown. Compared to age-matched controls (A),  
931 immunofluorescence for Th is very low at 540 dpi (B). **H**: Quantification of  
932 spinal Th<sup>+</sup> axons indicates a lack of regeneration of the spinal projection.  
933 Student's T-tests (with Welch's correction for heteroscedastic data) or Mann-  
934 Whitney U tests were used for pairwise comparisons as appropriate (\*p <

935 0.05; \*\*  $p < 0.01$ ; \*\*\*  $p < 0.001$ ). Bar in D = 100  $\mu\text{m}$  for A-D; bar in G = 100  $\mu\text{m}$

936 for F,G.

937

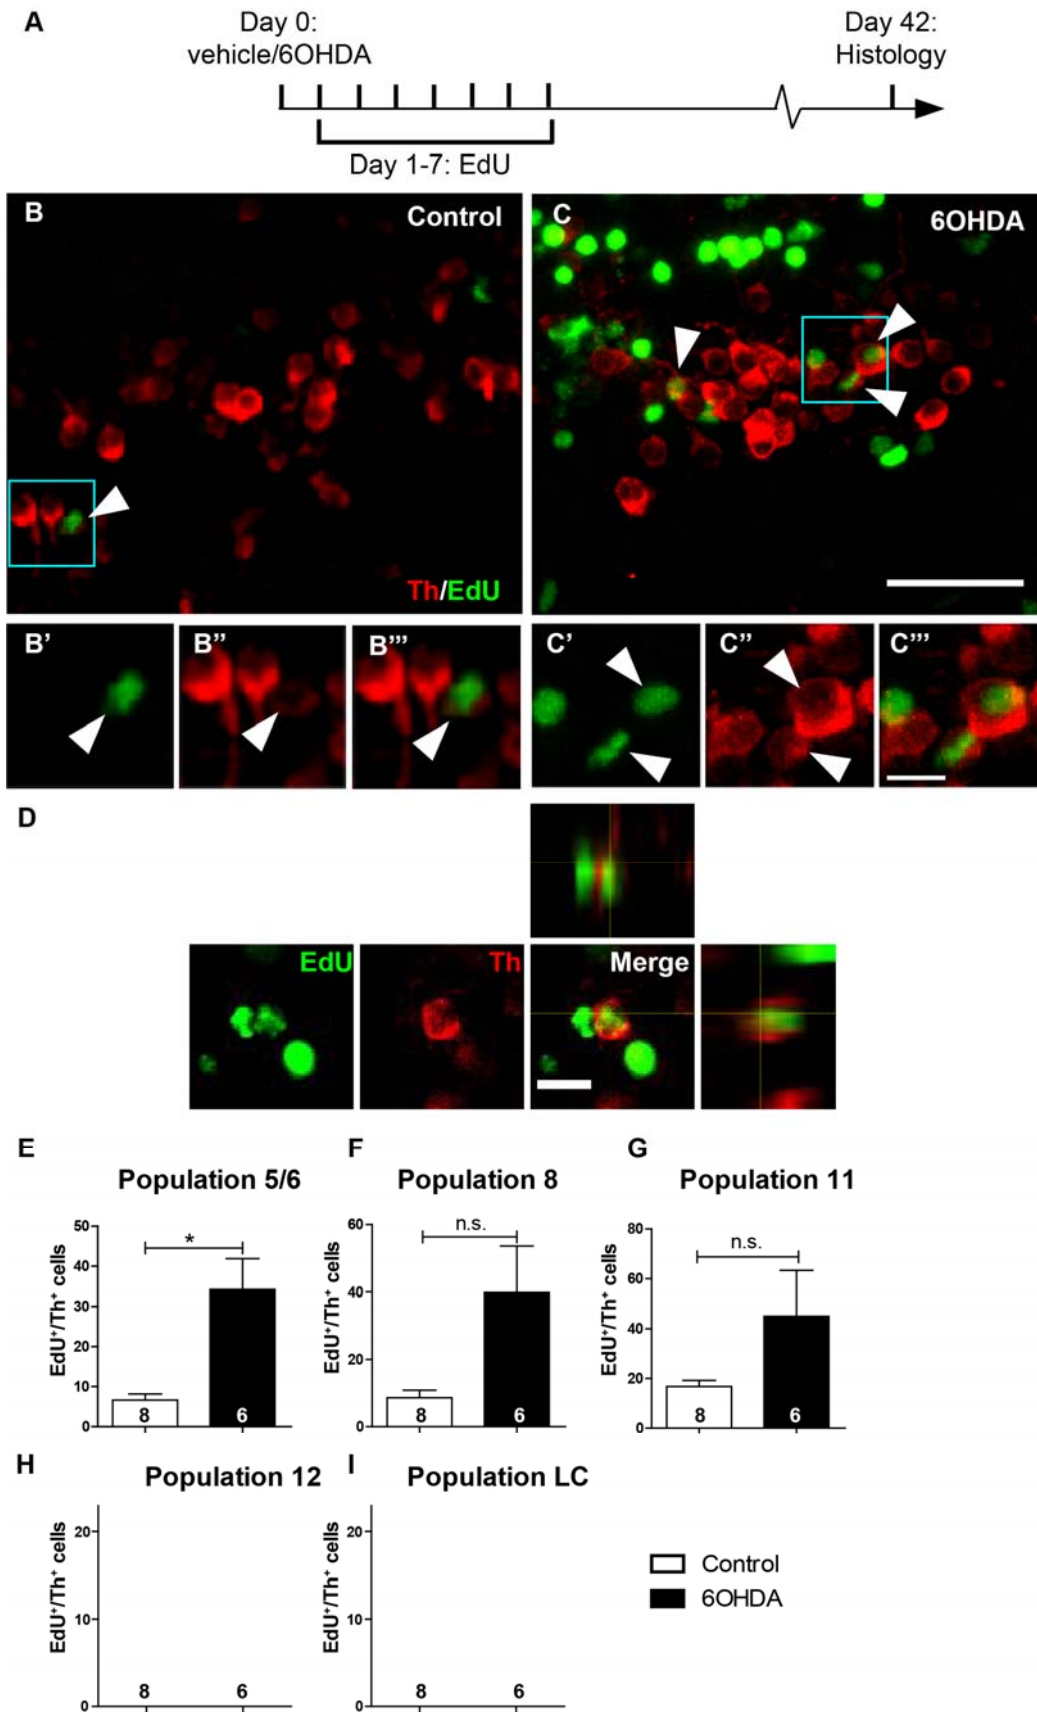

939 Fig. 4 Generation of new Th<sup>+</sup> cells is enhanced by prior ablation only in  
940 dopaminergic populations showing constitutive neurogenesis. **A:** The  
941 experimental timeline is given. **B,C:** In sagittal sections of population 5/6  
942 (rostral left; dorsal up), EdU and Th double-labelled cells can be detected.  
943 Boxed areas are shown in higher magnifications in B'-C''', indicating cells with  
944 an EdU labelled nucleus, which is surrounded by a Th<sup>+</sup> cytoplasm  
945 (arrowheads). **D:** A high magnification and orthogonal views of an EdU<sup>+</sup>/Th<sup>+</sup>  
946 cell after 6OHDA treatment is shown. **E-I:** Quantifications indicate the  
947 presence of newly generated Th<sup>+</sup> cells in specific dopaminergic brain nuclei  
948 (E-G). After 6OHDA treatment, a statistically significant increase in the  
949 number of these cells was observed for population 5/6. Note that population  
950 12 and LC showed no constitutive or ablation-induced EdU labelled Th<sup>+</sup> cells  
951 (H, I). (Student's T-tests with Welch's correction, \*p <0.05,). Bar in C = 20 μm  
952 for A,B; bar in C''' = 5 μm for B'- C''', bar in D = 10μm.  
953

954

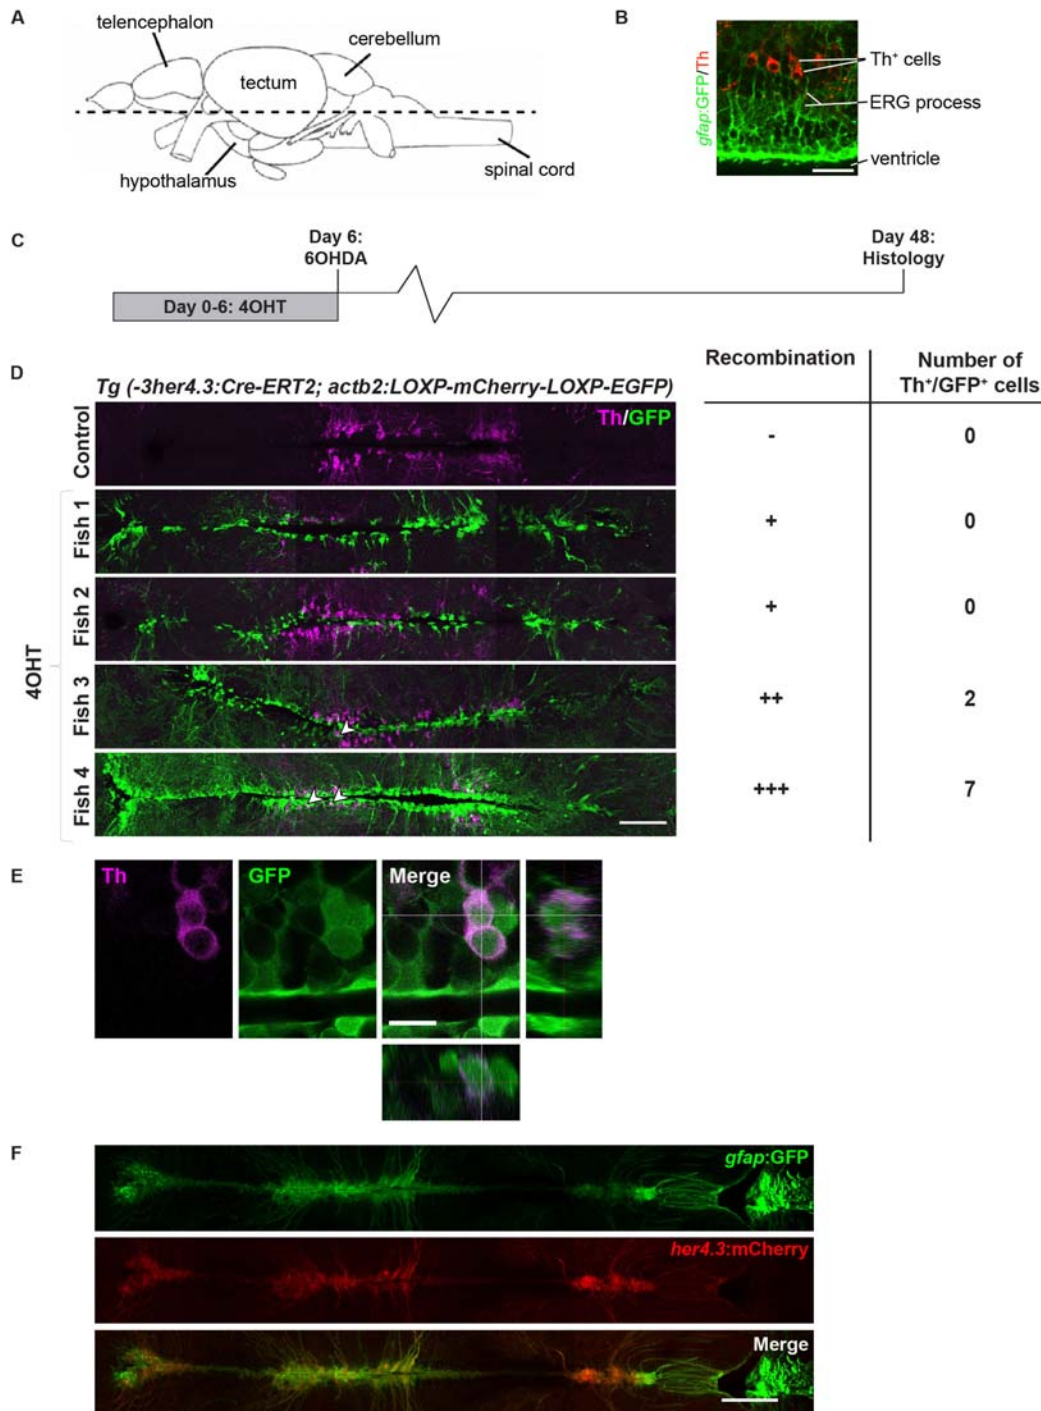

955

956

957 Fig. 5 Genetic lineage tracing identifies ERGs as a source for new Th<sup>+</sup> cells.

958 **A:** The horizontal section level of all photomicrographs is indicated (rostral is

959 left). **B:** Th<sup>+</sup> cells are in close vicinity to *gfap*:GFP<sup>+</sup> processes near the brain  
960 ventricle. **C,D:** Pulse-chase lineage tracing driven by *her4.3* indicates variable  
961 recombination and labelling of mainly ERGs and some Th<sup>+</sup> neurons. **E:** High  
962 magnification and orthogonal views indicate Th<sup>+</sup>/GFP<sup>+</sup> cells. **F:**  
963 *her4.3*:mCherry<sup>+</sup> cells largely overlap with *gfap*:GFP labelling in double-  
964 transgenic animals. Scale bars: in B = 25 μm, D and F = 100 μm; in E = 10  
965 μm.  
966



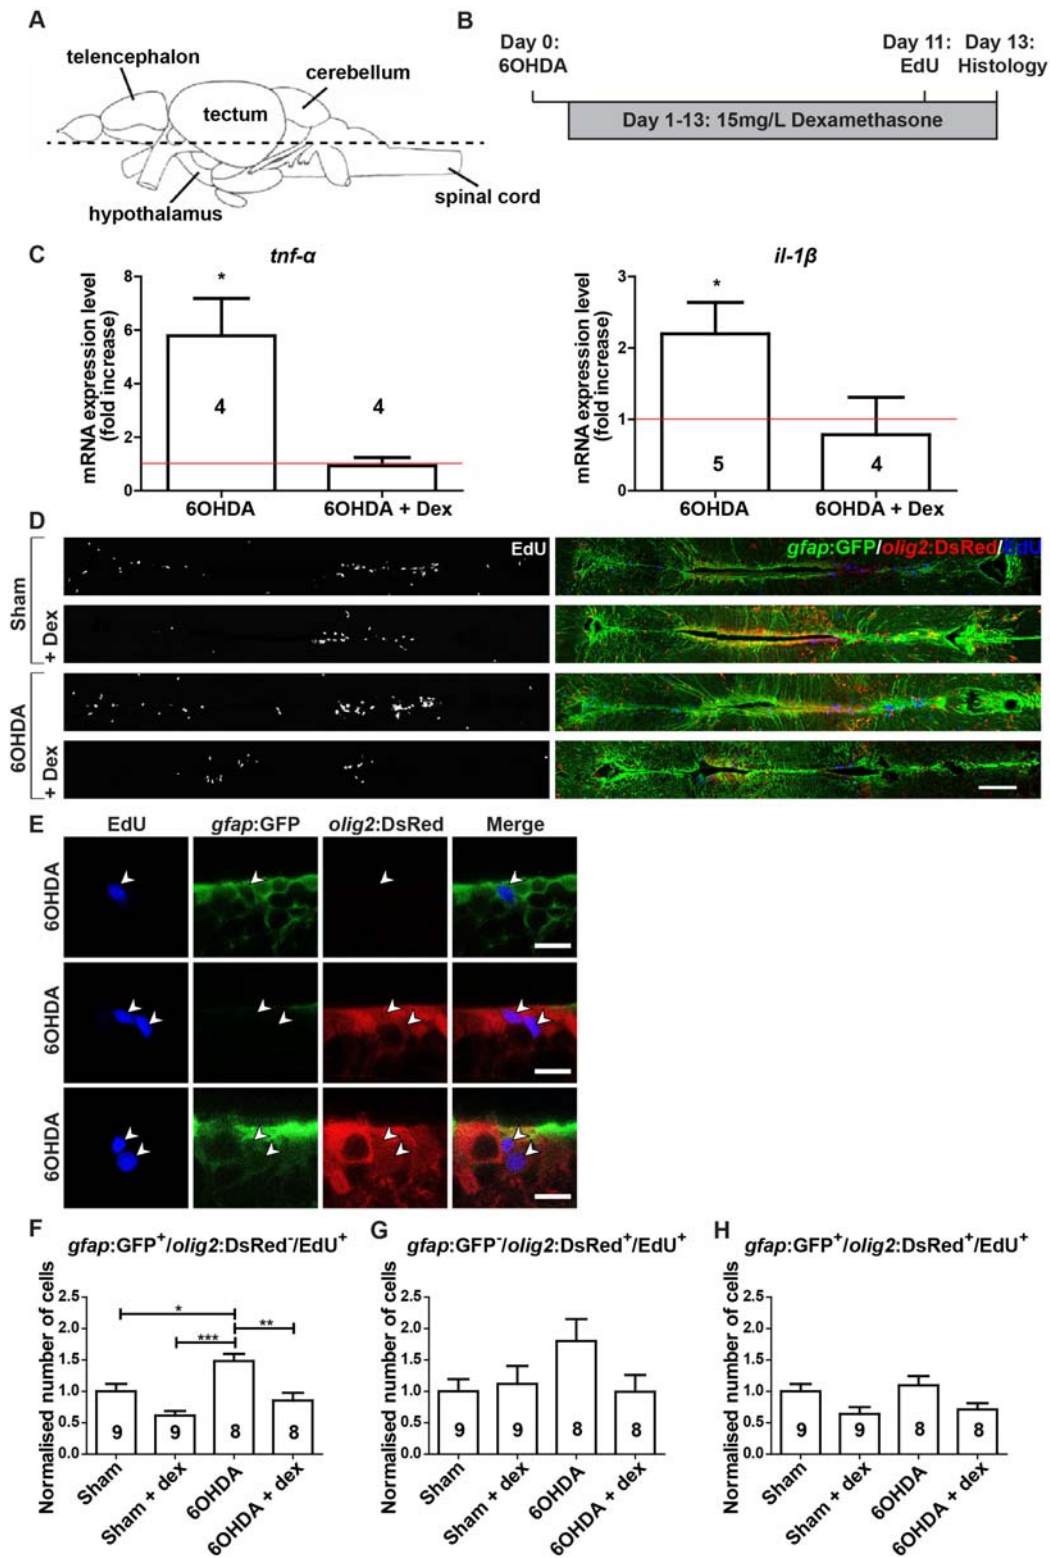

967

968

969 Fig. 6 6OHDA injection increases ERG proliferation, which is abolished by  
970 dexamethasone treatment. **A,B:** The section level of photomicrographs (A,  
971 rostral is left) and experimental timeline (B) are given. **C:** Levels of *il-1 $\beta$*  and  
972 *tnf- $\alpha$*  are increased by 6OHDA treatment at 3 dpi, but not in the presence of  
973 dexamethasone, as shown by qRT-PCR. Each condition is normalised to  
974 sham-injected fish (shown by the red line; one-tailed one-sample t-tests, \*p <  
975 0.05). **D,E:** Overviews (D) of the quantification areas and higher  
976 magnifications of ventricular cells (E) are given. EdU-labels ERGs that are  
977 only *gfap*:GFP<sup>+</sup>, only *olig2*:DsRed<sup>+</sup> or both (arrowheads). **F-H:** The  
978 proliferation rate in only *gfap*:GFP<sup>+</sup> ERGs is increased by 6OHDA injection  
979 and brought back to control levels by dexamethasone treatment (F). A similar  
980 non-significant trend is observed for only *olig2*:GFP<sup>+</sup> ERGs (G), but not for  
981 double-labelled ERGs (H). For F-H: One-way ANOVA with Bonferroni post-  
982 hoc test, \*p < 0.05, \*\*p < 0.01, \*\*\*p<0.001. Scale bars in C = 100  $\mu$ m; in D =  
983 10  $\mu$ m.

984  
985

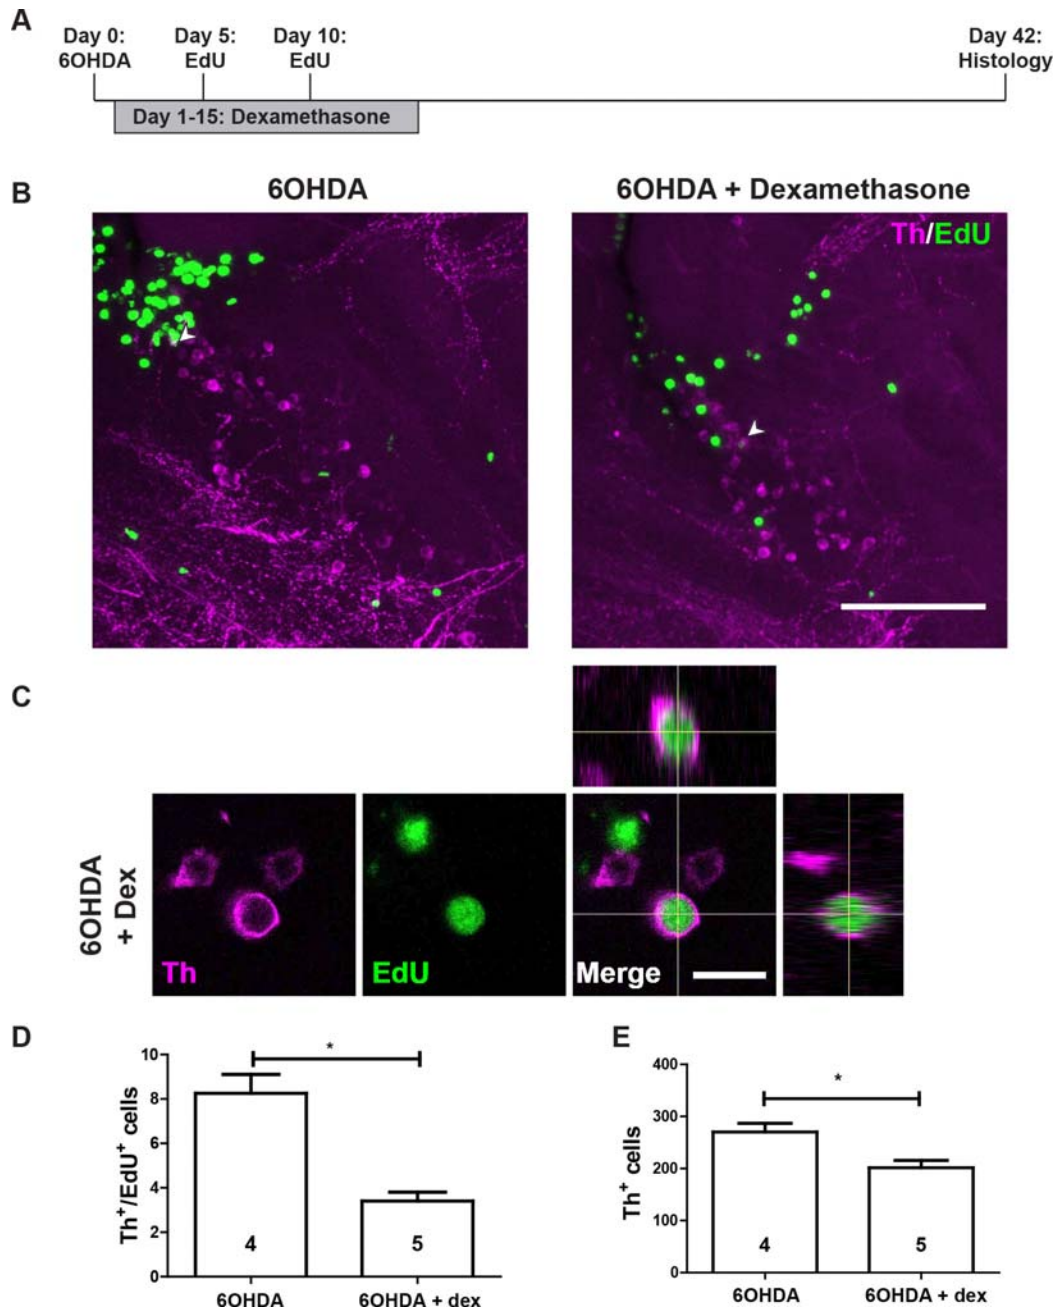

986

987

988 Fig. 7 Dexamethasone inhibits regeneration of Th<sup>+</sup> neurons in the 5/6

989 population. **A:** The experimental timeline is given. **B:** In sagittal sections of

990 population 5/6, EdU<sup>+</sup>/Th<sup>+</sup> neurons are present (arrowheads) after 6OHDA

991 injection, with or without addition of dexamethasone. **C:** High magnification

992 and orthogonal views of an EdU<sup>+</sup>/Th<sup>+</sup> neuron are shown. **D,E:** The number of

993 EdU<sup>+</sup>/Th<sup>+</sup> (D; Mann Whitney-U test, \*p < 0.05) and the overall number of Th<sup>+</sup>  
994 neurons (E; Student's t test, \*p < 0.05) are reduced by treating 6OHDA-  
995 injected animals with dexamethasone. Scale bar in B = 100 μm; in C = 10 μm.  
996

997

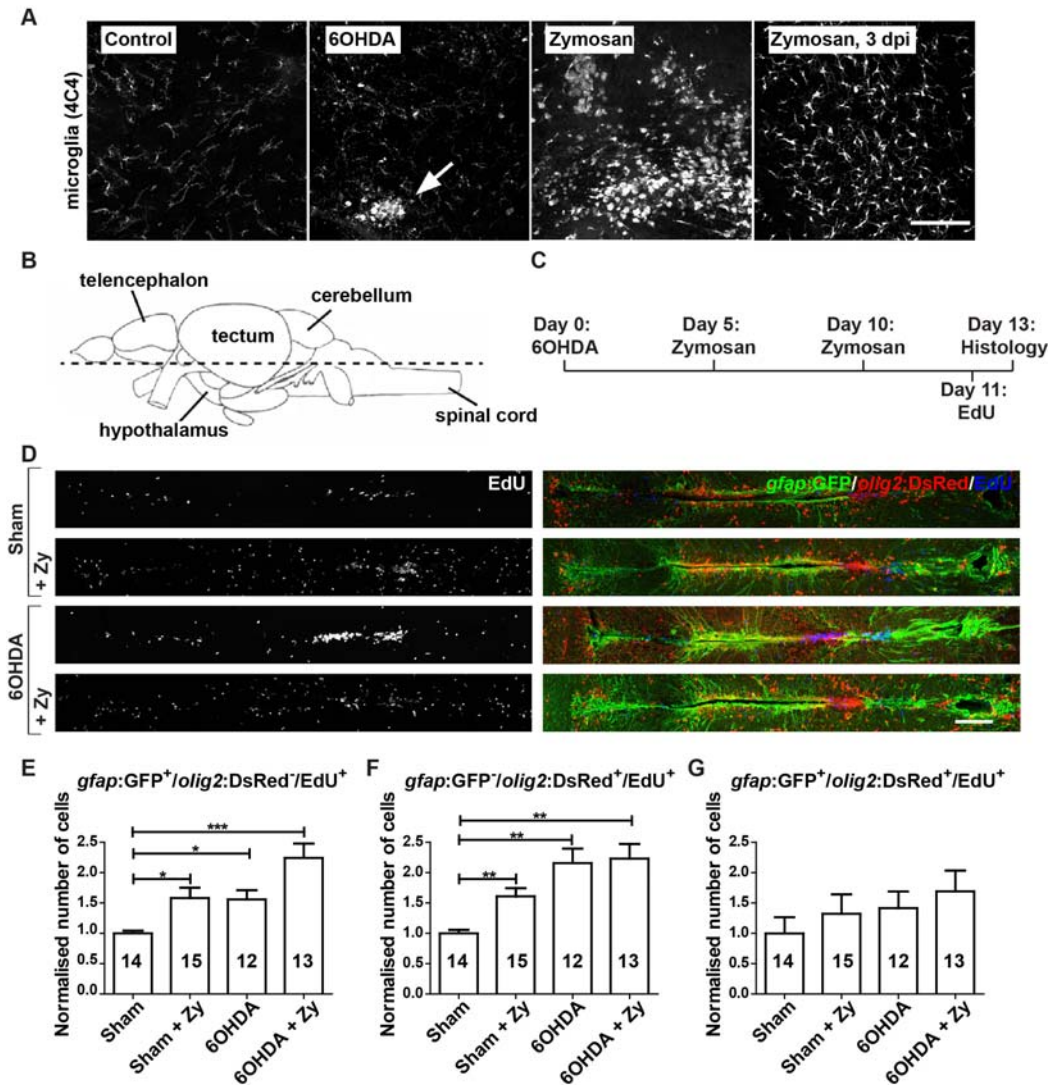

998

999 Fig. 8 6OHDA and Zymosan injections both increase ERG proliferation. **A:** In

1000 sagittal sections of population 5/6 restricted microglia activation at 24 hours

1001 after 6OHDA injection (arrow in B) compared to sham-injected control animals

1002 (A) is observed. Zymosan injection leads to much stronger non-localised

1003 microglia response that lasts for at least three days (C,D). **B:** The horizontal

1004 plane of sectioning for G is shown; rostral is left for all panels. **C:** The

1005 experimental timeline for D-G is given. **D-G:** 6OHDA injections and Zymosan

1006 injections, alone or in combination with 6OHDA, increase proliferation of

1007 ERGs (D). This is true for only *gfap*:GFP<sup>+</sup> (E) and only *olig2*:DsRed<sup>+</sup> (F), but  
1008 not double-labelled ERGs (G). One-way ANOVA with Welch's correction and  
1009 Games-Howell post-hoc test for H, I (\*p < 0.05, \*\*p < 0.01, \*\*\*p < 0.001), one-  
1010 way ANOVA for J (p > 0.05). Scale bar in D = 100 μm for A-D; in G = 100 μm.  
1011  
1012

1013

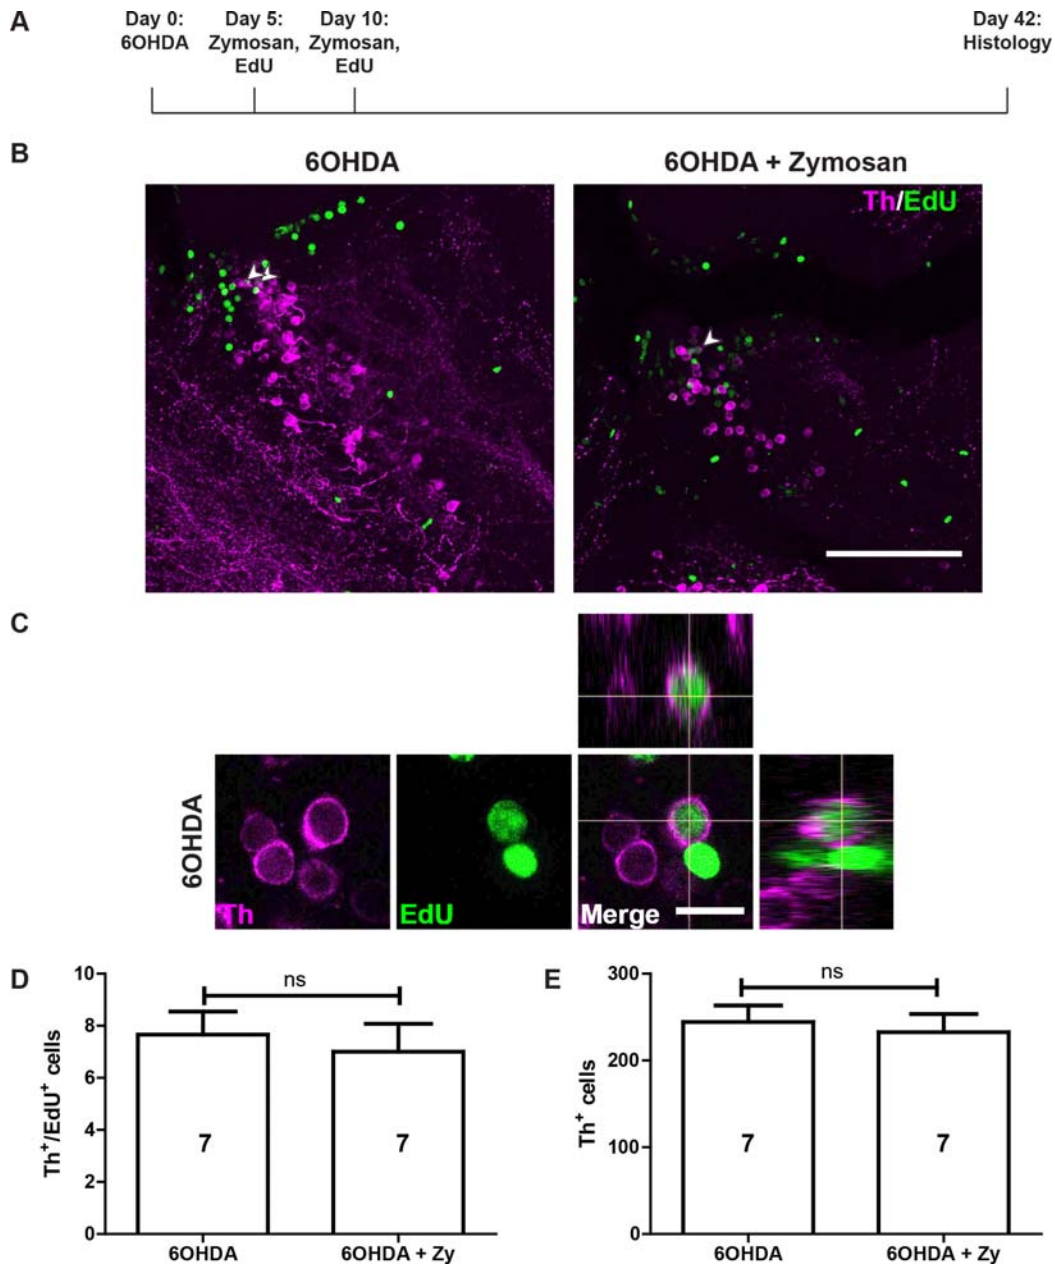

1014

1015

1016 Fig. 9 Zymosan treatment does not augment Th<sup>+</sup> neuron replacement in

1017 population 5/6. **A:** The experimental timeline is indicated. **B:** In sagittal

1018 sections of population 5/6, EdU<sup>+</sup>/Th<sup>+</sup> neurons can be observed (arrowheads)

1019 after 6OHDA injection with or without addition of Zymosan. **C:** High

1020 magnification and orthogonal views of an EdU<sup>+</sup>/Th<sup>+</sup> neuron are shown. **D,E:**

1021 The number of EdU<sup>+</sup>/Th<sup>+</sup> (D) and the overall number of Th<sup>+</sup> neurons (E) are  
1022 not increased by treating 6OHDA-injected animals with Zymosan (Student's  
1023 T-tests,  $p > 0.05$ ). Scale bar in B = 100  $\mu\text{m}$ ; in C = 10  $\mu\text{m}$ .

1024



1025

1026

1027

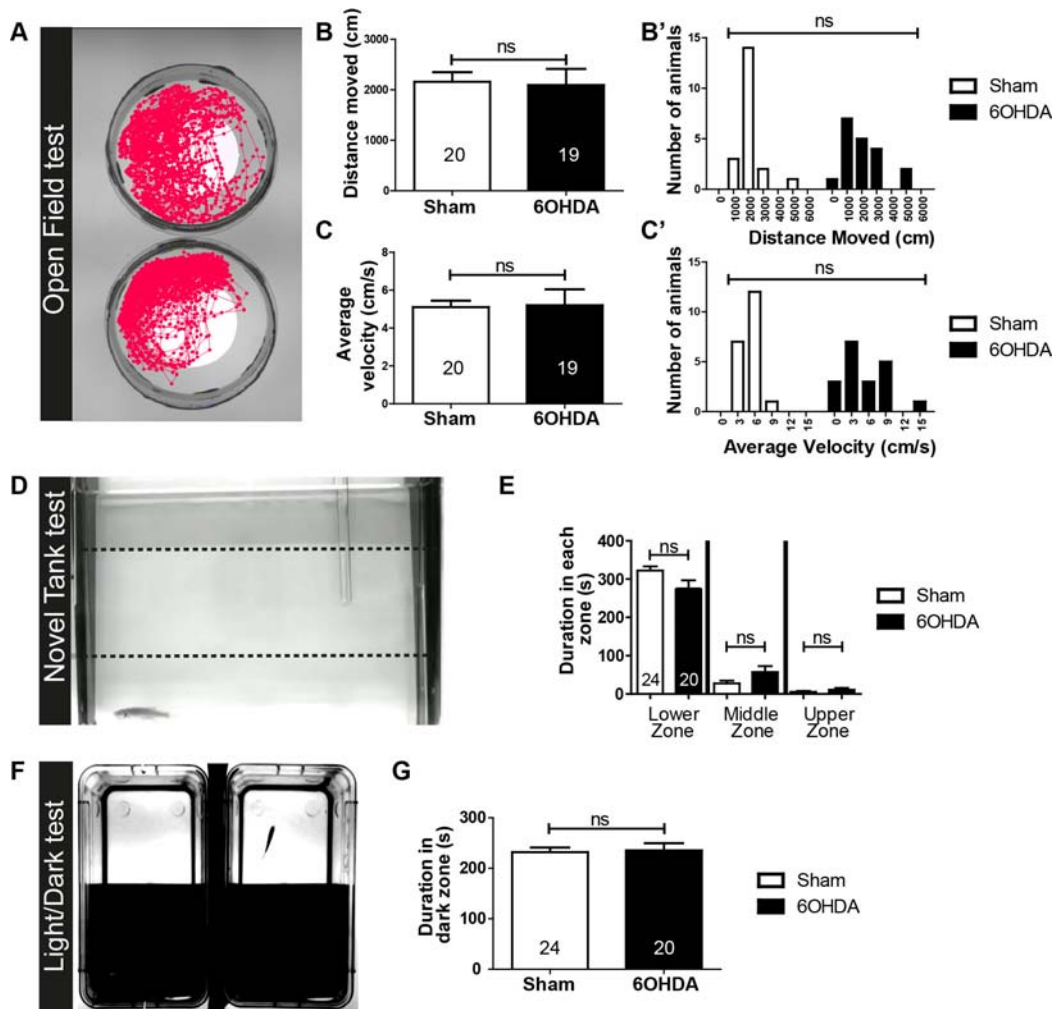

1028

1029

1030 Fig. 10: Basic swimming parameters and anxiety-like behaviours are

1031 unaltered by 6OHDA treatment. **A-C**: Typical swim tracks are shown (A).

1032 Quantifications of averages (B,C) and frequency distributions (B',C') of

1033 distance swum (B) and average velocity (C) showed no differences between

1034 control and treated fish (Student's T-test,  $p > 0.05$  for B and C; Kolmogorov-

1035 Smirnov Test,  $p > 0.05$  for B' and C'). **D,E**: A side view of a fish preferring the

1036 lower third of a novel tank is shown (D). Quantifications of time spent in the

1037 different depth of the tank (E) show the same preference for the lowest  
1038 compartment in control and 6OHDA treated fish (Mann-Whitney U-tests,  $p >$   
1039 0.05). **F:** The setup for the light/dark preference test is shown from above (F).  
1040 Quantifications (G) indicate that control and treated fish do not differ in their  
1041 preference for the dark compartment in a 300 seconds observation period  
1042 (Student's T-test,  $p > 0.05$ ).  
1043

1044

1045

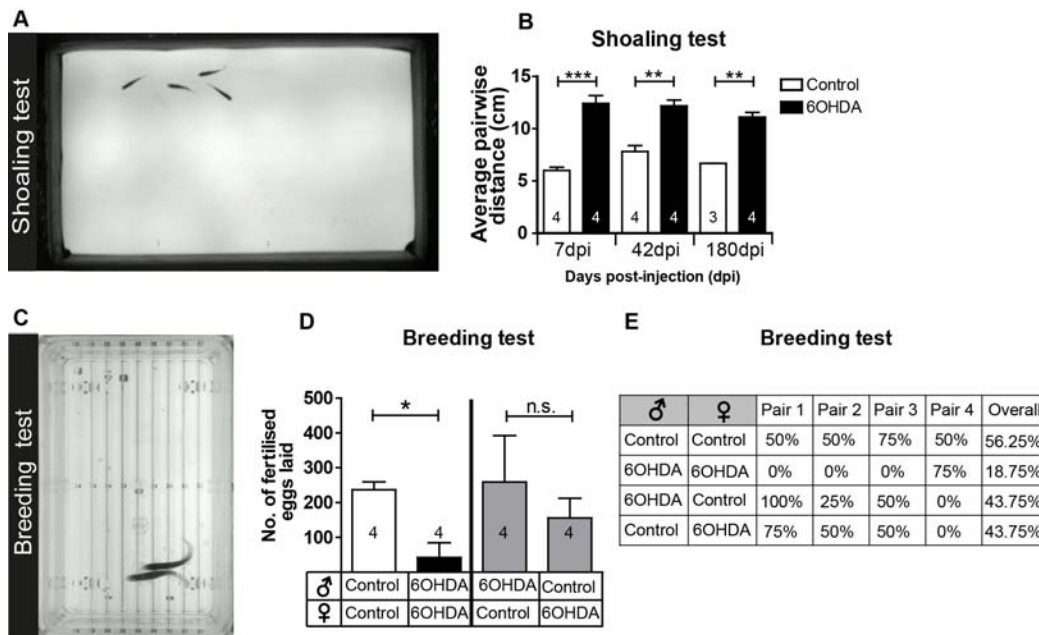

1046

1047

1048 Fig. 11 Injection of 6OHDA permanently impairs shoaling behaviour and  
 1049 decreases mating success. **A,B**: Shoaling behaviour as viewed from above in  
 1050 shallow water is shown in A. The average pairwise distance of fish from each  
 1051 other is significantly increased at all time points tested (Student's T-tests with  
 1052 Welch's correction for heteroscedastic data were used for pairwise  
 1053 comparisons; \* $p < 0,05$ , \*\* $p < 0.01$ , \*\*\* $p < 0.001$ ) . N-numbers indicate  
 1054 number of shoals of 4 fish each. **C-E**: Fish showing mating behaviour are  
 1055 shown from above (C). Clutch sizes (D) and mating success rates (E) are  
 1056 strongly reduced when animals are mated after 6OHDA injection. Mating the  
 1057 same females or males with the same control fish showed that mating  
 1058 success does not depend on lack of 6OHDA in either males or females alone.  
 1059 N-numbers indicate different pairs of fish (D; Mann-Whitney U-tests,  $P <$   
 1060 0.05).

1061

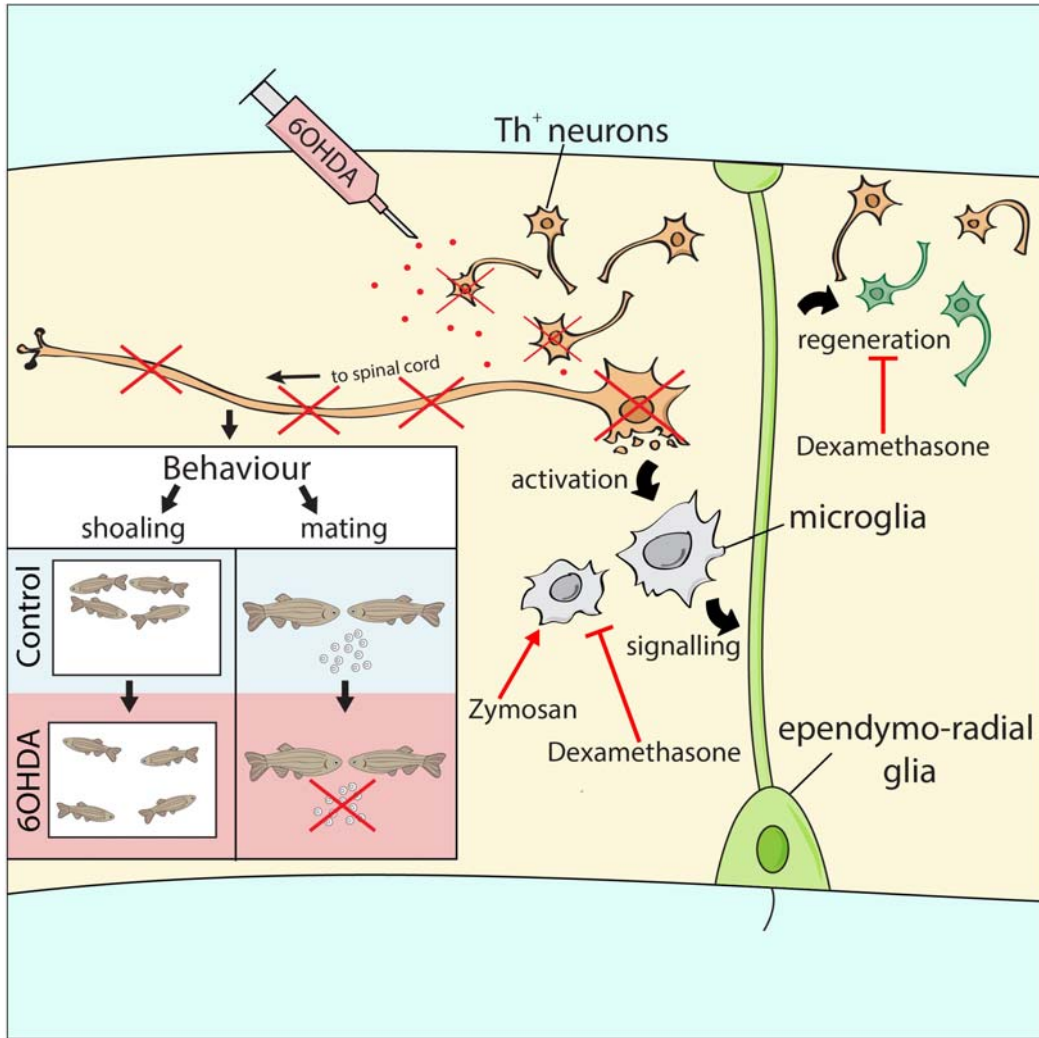

1062

1063

1064 Fig. 12 Schematic overview of results. 6OHDA injection ablates specific Th<sup>+</sup>

1065 cell populations, leading to a microglia response, which is necessary for

1066 regeneration of new dopaminergic neurons from ERGs. This is blocked by

1067 dexamethasone, whereas Zymosan stimulates ERG proliferation, but not

1068 addition of Th<sup>+</sup> neurons. Neurons projecting to the spinal cord are not

1069 replaced, associated with deficits in shoaling and mating behaviours.

1070

1071

1072

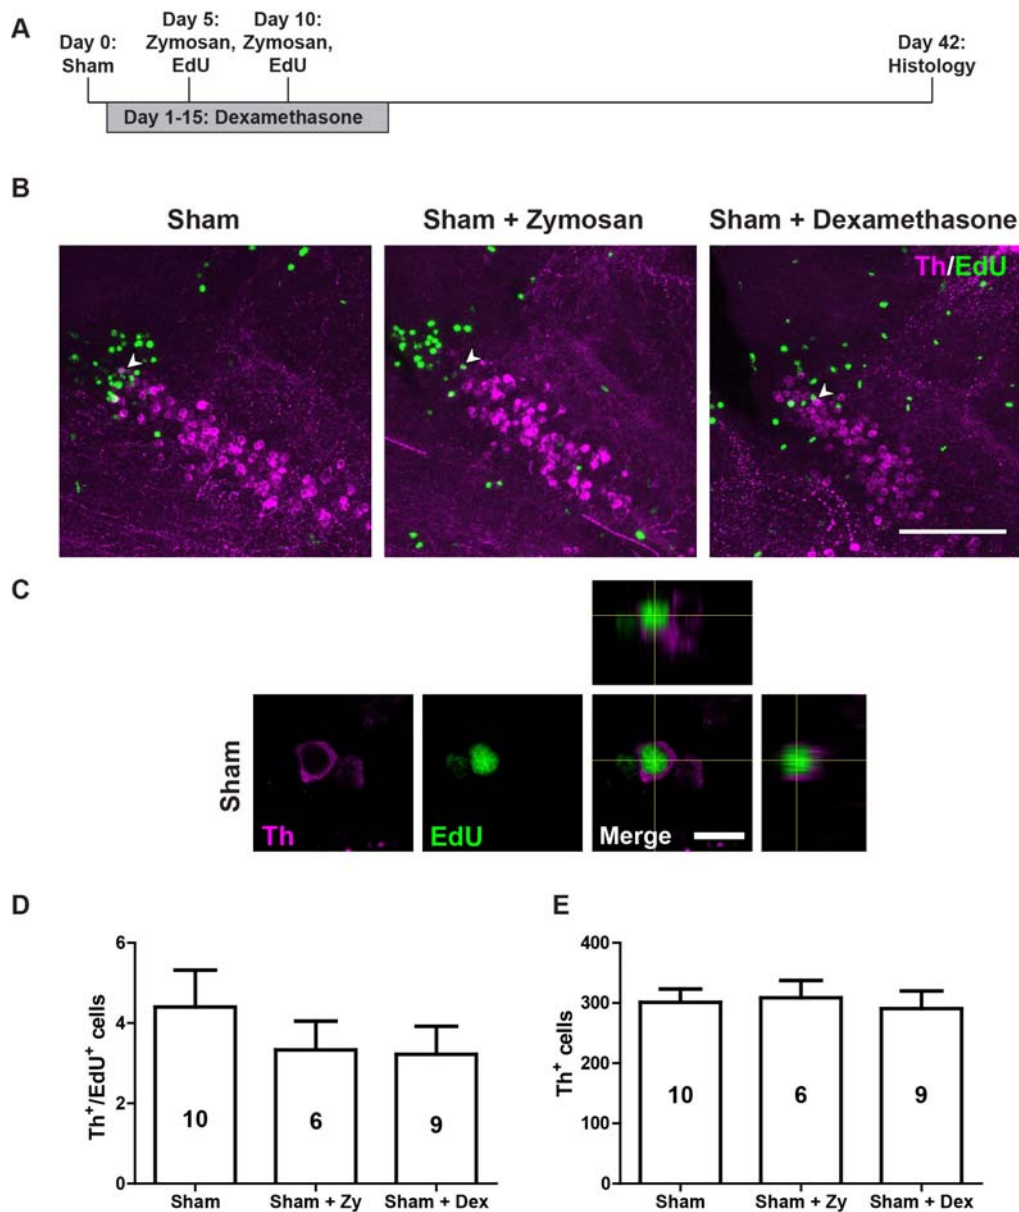

1073

1074

1075 S1: Immune system manipulations in animals in the absence of ablation do  
1076 not influence addition of new Th<sup>+</sup> cells. **A:** Timeline of experiments with either  
1077 Zymosan or dexamethasone treatment. **B:** In sagittal sections of population  
1078 5/6, EdU<sup>+</sup>/Th<sup>+</sup> neurons (arrowheads) can be observed in all experimental

1079 conditions. **C**: A high magnification and orthogonal views of a double-labelled  
1080 neuron in a sham-injected animal are shown. **D,E**: In animals without ablation  
1081 no changes are observed in the number of newly generated Th<sup>+</sup> neurons and  
1082 the overall number of Th neurons after dexamethasone or Zymosan treatment  
1083 (One-way ANOVA with Bonferroni post-hoc test used in D and E,  $p > 0.05$ ).  
1084 Scale bar in B = 100  $\mu\text{m}$ ; in C = 10  $\mu\text{m}$ .  
1085

1086

1087

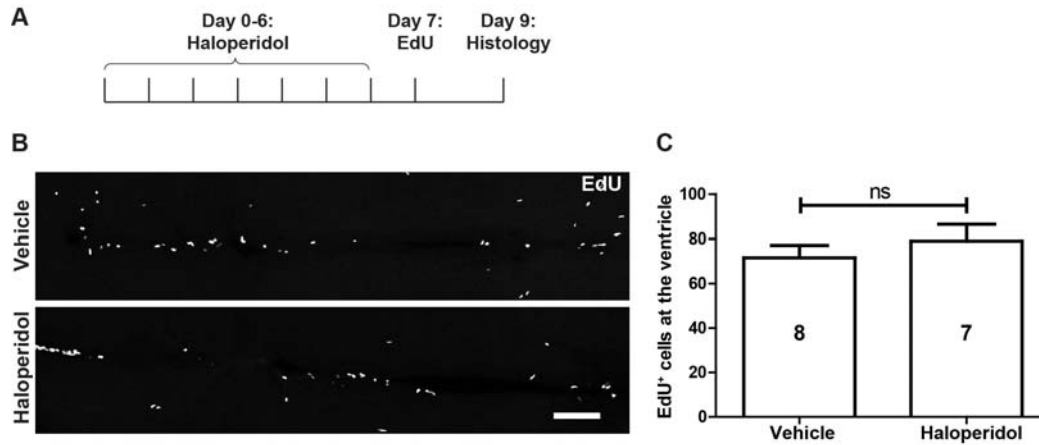

1088

1089

1090 S2: Inhibition of dopamine signalling does not affect ERG proliferation. **A:** The  
1091 experimental timeline for B,C is shown. **B,C:** Horizontal sections (B) and  
1092 quantification (C) show no effect of Haloperidol on proliferation in the ERG  
1093 layer. (Student's t-test,  $p > 0.05$ ). Scale bar in B = 100 μm.

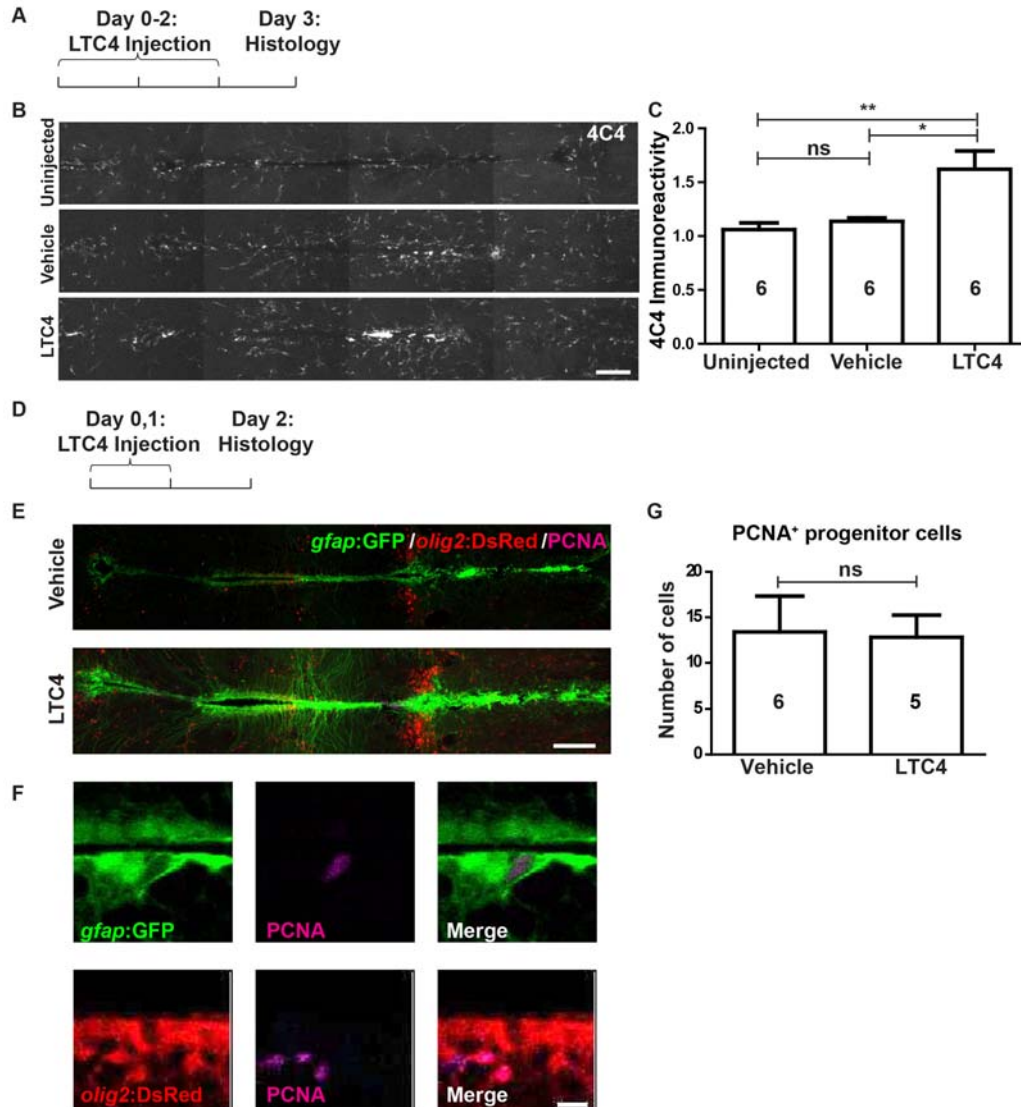

1094  
1095 S3: LTC4 moderately activates microglia but does not increase proliferation of  
1096 ERGs. Horizontal sections are shown, rostral is left. **A-C**: LTC4, but not  
1097 vehicle injection leads to an increase in microglia labelling in the brain **D-G**:  
1098 PCNA labelling in *gfap:GFP*<sup>+</sup> and/or *olig2:DsRed*<sup>+</sup> ERGs is not increased by



1099 LTC4 (One-way ANOVA with Bonferroni post-hoc test used in C, Mann  
1100 Whitney-U test used in G, \* $p < 0.05$ ). Scale bars = 100  $\mu\text{m}$  in B and E, 10  $\mu\text{m}$   
1101 in F.  
1102
